1 **Cell Type-Specific Modulation of Layer 6A Excitatory Microcircuits by**  
2 **Acetylcholine in Rat Barrel Cortex**

3

4 Danqing Yang<sup>1</sup>, Robert Günter<sup>2</sup>, Guanxiao Qi<sup>1</sup>, Gabriele Radnikow<sup>1</sup> and Dirk Feldmeyer<sup>1,3,4\*</sup>

5

6 <sup>1</sup>Institute of Neuroscience and Medicine, INM-10, Research Centre Jülich, D-52425 Jülich,  
7 Germany

8 <sup>2</sup>Institute of Neuroscience and Medicine, INM-2, Research Centre Jülich, D-52425 Jülich,  
9 Germany

10 <sup>3</sup>Department of Psychiatry, Psychotherapy and Psychosomatics, RWTH Aachen  
11 University, D-52074 Aachen, Germany.

12 <sup>4</sup>Jülich Aachen Research Alliance, Translational Brain Medicine (JARA Brain), D-52074  
13 Aachen, Germany

14

15 \* Corresponding author:

16 Dirk Feldmeyer

17 Institute of Neuroscience and Medicine (INM-10) Research Centre Jülich

18 D-52425 Jülich

19 Germany

20 Tel.: +49-2461-61-5226

21 Fax: +49-2461-61-1778

22 E-mail: [d.feldmeyer@fz-juelich.de](mailto:d.feldmeyer@fz-juelich.de)

23 **Abstract**

24 Acetylcholine (ACh) is known to regulate cortical activity during different behavioral states,  
25 e.g. wakefulness and attention. Here we show a differential expression of muscarinic ACh  
26 receptors (mAChRs) and nicotinic AChRs (nAChRs) in different layer 6A (L6A) pyramidal  
27 cell (PC) types of somatosensory cortex. At low concentrations, ACh induced a persistent  
28 hyperpolarization in corticocortical (CC) but a depolarization in corticothalamic (CT) L6A  
29 PCs via  $M_4$  and  $M_1$  mAChRs, respectively. At ~1 mM ACh depolarized exclusively CT PCs  
30 via  $\alpha_4\beta_2$  subunit-containing nAChRs without affecting CC PCs. Miniature EPSC frequency  
31 in CC PCs was decreased by ACh but increased in CT PCs. In synaptic connections with a  
32 presynaptic CC PC, glutamate release was suppressed via  $M_4$  mAChR activation but  
33 enhanced by nAChRs when the presynaptic neuron was a CT PC. Thus, in layer 6A the  
34 interaction of mAChRs and nAChRs results in an altered excitability and synaptic release,  
35 effectively strengthening corticothalamic while weakening corticocortical synaptic signaling.  
36

37 **Keywords:** barrel cortex, layer 6, pyramidal cells, acetylcholine, muscarinic receptors,  
38 nicotinic receptors, corticocortical, corticothalamic

## 39 Introduction

40 Acetylcholine (ACh) has been shown to play a major role in memory processing, arousal,  
41 attention and sensory signaling (Hasselmo, 2006; Hasselmo and Sarter, 2011; Jones, 2004;  
42 Ma et al., 2018; Thiele, 2013; Wester and Contreras, 2013). It has been demonstrated that  
43 the ACh concentration in the cerebrospinal fluid increases during wakefulness and sustained  
44 attention (Himmelheber et al., 2000; Teles-Grilo Ruivo et al., 2017). In the neocortex release  
45 of ACh occurs predominately via afferents originating from cholinergic neurons in the  
46 nucleus basalis of Meynert of the basal forebrain (Mesulam et al., 1983; Paul et al., 2015;  
47 Zaborszky et al., 2015); their terminals are densely distributed throughout all neocortical  
48 layers (Eckenstein et al., 1988; Henny and Jones, 2008; Kalmbach et al., 2012). A classical  
49 view is that ACh invariably increases the excitability of excitatory neurons in neocortex  
50 (Desai and Walcott, 2006; Hedrick and Waters, 2015; McCormick and Prince, 1985;  
51 Mednikova et al., 1998; Zhang and Seguela, 2010). However, a persistent hyperpolarization  
52 in layer 4 (L4) excitatory neurons was found in somatosensory cortex (Dasgupta et al., 2018;  
53 Eggermann and Feldmeyer, 2009). This layer-specific cholinergic modulation may  
54 contribute to improving the cortical signal-to-noise ratio (Obermayer et al., 2017; Poorthuis  
55 et al., 2013; Radnikow and Feldmeyer, 2018).

56 Although extensive studies have been conducted on the cholinergic modulation of  
57 neocortical excitatory neurons, the action of ACh on the layer 6 (L6) microcircuitry has not  
58 been systematically investigated. Two main pyramidal cell (PC) classes exist in cortical layer  
59 6, namely corticothalamic (CT) and corticocortical (CC) PCs. These two neuron types differ  
60 in their axonal projection patterns, dendritic morphological features, electrophysiological  
61 properties and expression of molecular markers (Kumar and Ohana, 2008; Pichon et al.,  
62 2012; Sundberg et al., 2018; Thomson, 2010; Zhang and Deschenes, 1997). CC PCs have  
63 no subcortical target and send intracortical projections mainly within the infra-granular layers  
64 (Thomson, 2010); CT PCs, in contrast, have few axons distributed in cortex and send  
65 projections directly back to the thalamus thereby contributing to a feedback control of  
66 sensory input (Beierlein and Connors, 2002; Constantinople and Bruno, 2013; Lubke and  
67 Feldmeyer, 2007; Oberlaender et al., 2012; Yang et al., 2014). The question how the  
68 function of these two classes of L6 PCs is modulated by ACh has so far not been explored.

69 Recent optogenetic studies suggest that PCs in L5 and L6 receive direct cholinergic inputs  
70 (Hay et al., 2016; Hedrick and Waters, 2015). In these neurons, ACh induces a slowly  
71 desensitizing inward current in L6 PCs of prefrontal cortex through activation of  $\alpha_4\beta_2$  subunit  
72 containing synaptic nicotinic acetylcholine receptors (nAChRs) (Alves et al., 2010; Bailey et

73 al., 2012; Hay et al., 2016; Kassam et al., 2008; Poorthuis et al., 2013). However, there are  
74 very few studies focusing on the effects of muscarinic acetylcholine receptors (mAChRs) in  
75 L6A neurons (Sundberg et al., 2018; Tian et al., 2014). Here, using single and paired patch-  
76 clamp recordings with simultaneous biocytin-filling, we investigated both muscarinic and  
77 nicotinic modulation of morphologically identified excitatory neurons and their synaptic  
78 connections in layer 6A of rat primary somatosensory barrel cortex. We found that ACh  
79 shows a cell type-specific effect on both cellular and synaptic properties in L6A excitatory  
80 microcircuits through activation of mAChRs and/or nAChRs. Our results reveal that two  
81 functionally and morphologically distinct subpopulations of L6A PCs, CC and CT PCs, are  
82 differentially modulated by ACh. We demonstrate that ACh suppresses intracortical synaptic  
83 transmission via somatodendritic hyperpolarization and inhibition of presynaptic  
84 neurotransmitter release of CC PCs by activating M<sub>4</sub>R<sub>s</sub>. In contrast, CT PC show a dual  
85 cholinergic modulation: These neurons are depolarized via M<sub>1</sub> mAChRs and  $\alpha_4\beta_2$  subunit-  
86 containing nAChRs while the presynaptic release probability is enhanced by nAChRs. In this  
87 way, ACh contributes to a facilitation of corticothalamic feedback.

## 88 Results

### 89 ACh either depolarizes or hyperpolarizes L6A PCs through activation of mAChRs

90 Whole-cell patch clamp recordings from L6A neurons were performed in acute brain slices  
91 of rat barrel cortex with simultaneous biocytin fillings. During recordings, excitatory neurons  
92 were distinguished from interneurons by their regular firing pattern with a low maximum firing  
93 frequency. Following bath application of 100  $\mu$ M ACh, one subset of L6A PCs showed a  
94 membrane potential hyperpolarization by on average  $-2.0 \pm 1.0$  mV ( $n = 14$ ), whereas  
95 another was depolarized by  $+9.5 \pm 6.1$  mV ( $n = 15$ ; Fig. 1a). In addition, 1 s current pulses  
96 were injected in the recorded neuron to elicit AP firing before and during bath application of  
97 ACh. Under the supra-threshold stimulus (100pA above the rheobase current), the firing  
98 frequency was decreased by ACh in L6A PCs showing an ACh-induced hyperpolarization  
99 but increased in PCs that exhibit a depolarizing ACh response (**Fig. 1a, b**). Notably, both  
100 ACh-induced hyperpolarization and depolarization were not transient but persisted until the  
101 end of bath application. For L2/3 and L5 PCs it has been reported that the ACh-induced  
102 depolarization was preceded by an initial transient hyperpolarization mediated by 'small  
103 conductance',  $Ca^{2+}$ -activated  $K^+$  channels (sK channels; Dasari et al., 2017; Eggermann and  
104 Feldmeyer, 2009; Gullledge and Kawaguchi, 2007; Gullledge and Stuart, 2005). We were  
105 able to reproduce this finding under the same recording condition; however, the de- and  
106 hyperpolarizing cholinergic response in L6A PCs induced by ACh puff application was  
107 always monophasic (**Fig. S1**).

108 To determine which fraction of the membrane potential changes in L6A pyramidal neurons  
109 is mediated by mAChRs, 20  $\mu$ M atropine (ATRO, a general mAChR antagonist) was applied  
110 in voltage-clamp mode. Both the ACh-induced outward and inward currents were found to  
111 be strongly blocked by ATRO (20  $\mu$ M) (**Fig. 1 c, d**), suggesting that both ACh response  
112 types in L6A excitatory neurons are almost exclusively mediated by mAChRs. We  
113 hypothesized that the  $G_{i/o}$  protein coupled  $M_4$  mAChR subtype ( $M_4$ Rs) mediates the  
114 hyperpolarizing effects while the  $G_{q/11}$  protein-coupled  $M_1$  mAChR subtype ( $M_1$ Rs) is  
115 responsible for the depolarization induced by ACh application. To test this, puff application  
116 of ACh (100  $\mu$ M) was performed in the presence and absence of the selective mAChR  
117 antagonists in the perfusion solution. In the presence of 1  $\mu$ M tropicamide (TRO, a selective  
118  $M_4$ R antagonist), the ACh-induced hyperpolarization was abolished (**Fig. 1e, g**). Conversely,  
119 the ACh-induced depolarization was blocked by 0.5  $\mu$ M pirenzepine (PIR, a selective  $M_1$ R  
120 antagonist; **Fig. 1f, h**). These results indicate that the persistent hyperpolarization and

121 depolarization induced by low concentrations of ACh are mediated exclusively by M<sub>4</sub>R<sub>s</sub> and  
 122 M<sub>1</sub>R<sub>s</sub>, respectively.  
 123

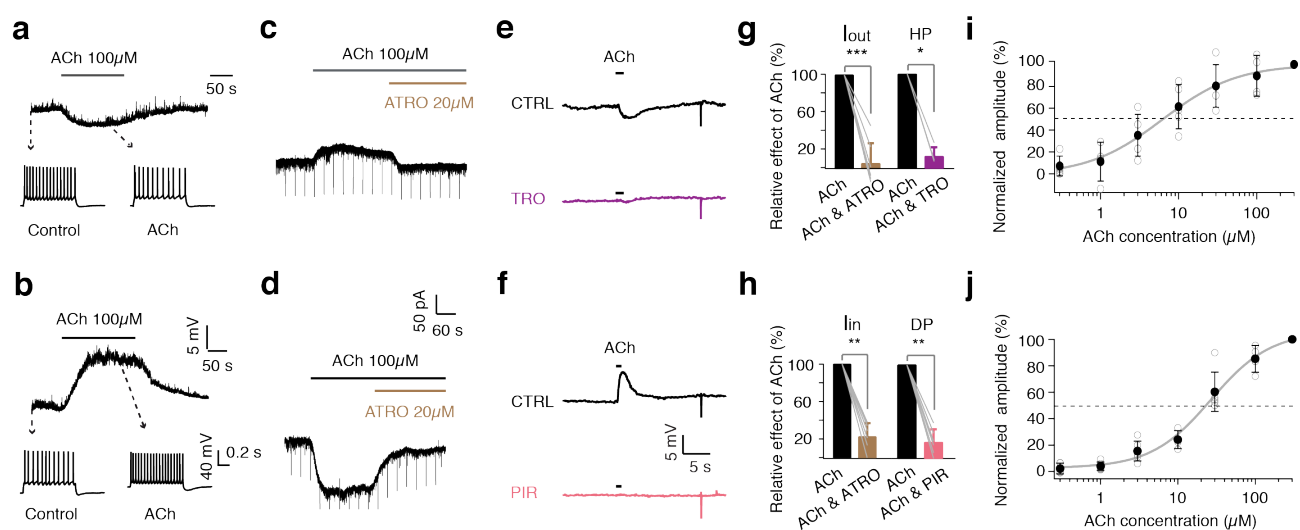

124  
 125 **Fig. 1 Low concentrations of ACh induce either a hyperpolarization or a**  
 126 **depolarization of L6A PCs by activating mAChRs.**

127 (a, b) Top, L6A PC either show a hyperpolarizing (a) or a depolarizing (b) response following  
 128 bath application of 100 μM ACh. Bottom, firing patterns of neurons in response to 1 s  
 129 depolarising current injection (rheobase + 100 pA) before and during ACh application.

130 (c, d) Representative voltage-clamp recordings with bath application of ACh showing  
 131 outward current (I<sub>out</sub>) (e) or inward current (I<sub>in</sub>) (f) in L6A PCs. The effects are blocked by 20  
 132 μM atropine (ATRO).

133 (e, f) Representative current-clamp recordings showing that puff application of ACh (100 μM)  
 134 evokes a fast hyperpolarization (HP) (g) or depolarization (DP) (h) in L6A PCs. The specific  
 135 M<sub>1</sub> mAChR antagonist pirenzepine (PIR, 0.5 μM) or the specific M<sub>4</sub> mAChR antagonist  
 136 tropicamide (TRO, 1 μM), respectively, were added to the perfusion solution to block ACh-  
 137 induced membrane potential changes.

138 (g, h) Summary bar graphs showing the percentage block by general and specific mAChR  
 139 antagonists. n = 7, p = 0.0006 for I<sub>out</sub> group, n = 7, p = 0.0022 for I<sub>in</sub> group, n = 4, p = 0.029  
 140 for HP group and n = 6, p = 0.0022 for DP group. Statistical analysis was performed using  
 141 Mann-Whitney U-test. Error bars represent SD.

142 (i, j) Muscarinic responses of ACh were examined in the presence of 1 μM mecamylamine  
 143 (MEC) and 0.5 μM TTX. ACh dose-response curves for hyperpolarizing (n = 5) (c) and  
 144 depolarizing (n = 8) (d) L6A PCs are fitted by the Hill equation. Dashed lines represent half  
 145 maximal effects. The corresponding EC<sub>50</sub> is 6.2 ± 1.3 μM for hyperpolarizing PCs and 26.7  
 146 ± 5.4 μM for depolarizing PCs. Filled circles represent mean values of different ACh  
 147 concentrations.

148

149 The dose-dependence of the muscarinic effects was investigated by bath application of  
150 increasing concentrations of ACh in the presence of 1  $\mu\text{M}$  mecamylamine (MEC, a general  
151 nAChR antagonist) and 0.5  $\mu\text{M}$  tetrodotoxin (TTX) (0.3  $\mu\text{M}$  to 300  $\mu\text{M}$ ; **Fig. 1i, j**). The dose-  
152 response curve was obtained by fitting the data to the Hill equation. For hyperpolarizing L6A  
153 PCs, the ACh concentration for a half-maximum response ( $\text{EC}_{50}$ ) was  $6.2 \pm 1.3 \mu\text{M}$  while for  
154 depolarizing neurons, the  $\text{EC}_{50}$  was  $26.7 \pm 5.4 \mu\text{M}$ . Thus, an ACh concentration of 30  $\mu\text{M}$   
155 was adopted for all subsequent experiments; this concentration resulted in a >50% of the  
156 maximum response in both subgroups of L6A excitatory neurons. In addition, when only 30  
157  $\mu\text{M}$  ACh was used neurons did not respond with AP firing which was occasionally observed  
158 when applying 100  $\mu\text{M}$  ACh.

159

### 160 **Cholinergic responses in L6A PCs are cell-type specific**

161 To investigate whether the two different cholinergic response types are specific for a defined  
162 L6A pyramidal cell type, we characterized L6A PCs by their morphological,  
163 electrophysiological and molecular features. Here, a total of 105 excitatory L6A neurons  
164 were recorded and morphologically reconstructed. Previous studies have consistently  
165 shown that CC and CT L6A PCs can be distinguished reliably by their axonal projection  
166 patterns (Kumar and Ohana, 2008; Mercer et al., 2005; Pichon et al., 2012; Zhang and  
167 Deschenes, 1997). Of all excitatory cells, 74 (70.5%) were identified as putative CT PCs  
168 while 31 (29.5%) were putative CC PCs. CC L6A PCs displayed a dense horizontal axonal  
169 projection pattern in infragranular layers spanning several neighboring barrel columns; CT  
170 L6A PCs, on the other hand, showed a sparse columnar axonal domain with the majority of  
171 collaterals projecting directly towards the pia and terminating predominately in layer 4 (**cf**  
172 **Fig. 2a left and right panels**). CC PCs have a significantly larger axonal ( $15523 \pm 5013 \mu\text{m}$   
173 vs.  $5209 \pm 1462 \mu\text{m}$ ,  $P < 0.001$ ) and dendritic length ( $5921 \pm 1346 \mu\text{m}$  vs.  $5134 \pm 1070 \mu\text{m}$ ,  
174  $P < 0.05$ ) compared to CT PCs. Similar differences were also detected in the horizontal  
175 axonal and dendritic field span ( $1714 \pm 350 \mu\text{m}$  vs.  $358 \pm 111 \mu\text{m}$ ,  $P < 0.001$  and  $361 \pm 58$   
176  $\mu\text{m}$  vs.  $232 \pm 28 \mu\text{m}$ ,  $P < 0.001$ , respectively, for CC vs. CT L6A PCs). For CC L6A PCs  
177 these values are likely to be strong underestimates (by  $\geq 90\%$ , cf. Narayanan et al., 2015)  
178 because in acute slice preparations their long-range axonal collaterals will be severely  
179 truncated; however, this does not prevent an unambiguous cell type identification. In  
180 addition, CC L6A PCs have more first order axon collaterals ( $p < 0.001$ ) but fewer dendrites  
181 ( $p < 0.001$ ) than CT PCs (**Fig. 2b**). The features described above are reflected in the polar  
182 plots (**Fig. 2a**).

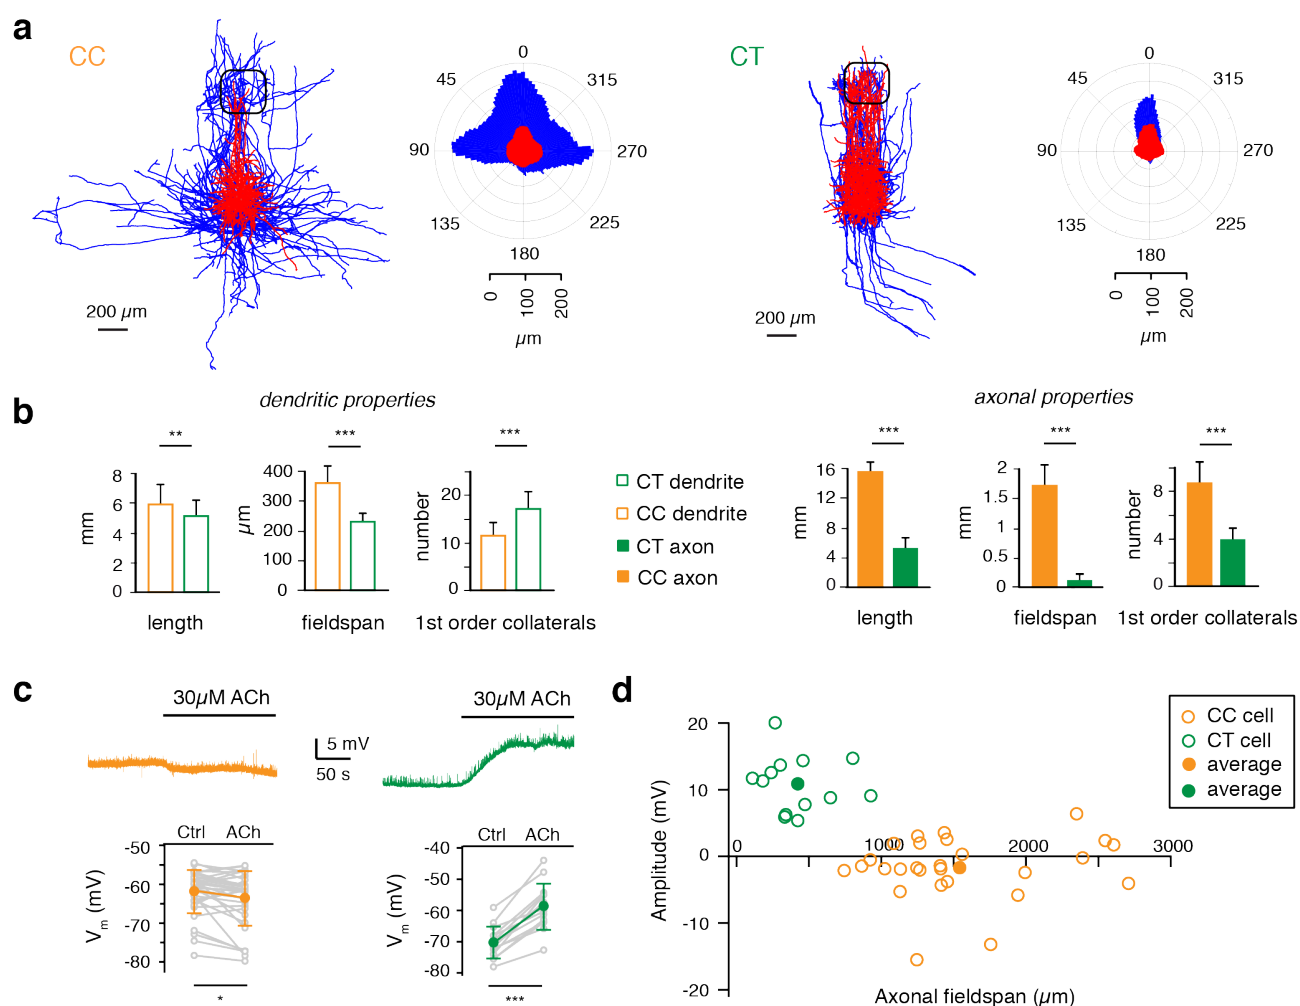

183

184 **Fig. 2 ACh hyperpolarizes CC L6A PCs but depolarizes CT L6A PCs.**

185 **(a)** Left, overlay of reconstructions of CC and CT PCs. Reconstructions of PCs were aligned  
 186 with respect to the barrel center. Right, polar plots of CC and CT PCs.  $n = 15$  for each group.  
 187 Somatodendrites are shown in red and axons are shown in blue.

188 **(b)** Histograms comparing the length, fieldspan and number of first order collaterals of  
 189 axonal and dendritic structures for the two groups of PCs.  $n = 21$  for CC neurons and  $n = 54$   
 190 for CT neurons. Dendritic length:  $p = 0.0015$ , dendritic fieldspan:  $p = 1.4 \times 10^{-10}$ , number of  
 191 dendritic main nodes:  $p = 1.7 \times 10^{-6}$ ; Axonal length:  $p = 9.6 \times 10^{-8}$ , dendritic fieldspan:  $p =$   
 192  $4.8 \times 10^{-11}$ , number of axonal main nodes:  $p = 8.5 \times 10^{-11}$  for Mann-Whitney  $U$ -test.

193 **(c)** Top, representative current-clamp recordings of a depolarizing CC (orange) and a  
 194 hyperpolarizing CT pyramidal cell (green) following bath application of 30  $\mu\text{M}$  ACh. Bottom,  
 195 histograms of resting membrane potential ( $V_m$ ) of L6A CC PCs in control and in the presence  
 196 of 30  $\mu\text{M}$  ACh ( $n = 35$ ,  $p = 0.019$  for Wilcoxon signed-rank test) and CT ( $n = 14$ ,  $p = 6.1$   
 197  $\times 10^{-5}$  for Wilcoxon signed-rank test) PCs.

198 **(d)** Plots of the ACh-induced change in  $V_m$  vs axonal fieldspan for two subtypes of PCs.  
 199 Open orange circles, data from individual CC PCs ( $n = 27$ ); open green circles, data from  
 200 individual CT PCs ( $n = 13$ ). Filled orange circle, average data from CC cells; filled green  
 201 circle, average data from CT cells.



202 In addition, we determined the electrophysiological properties of morphologically identified  
203 CC (n = 11) and CT (n = 9) L6A PCs. Compared to CT PCs, CC PCs showed a significantly  
204 lower  $R_{in}$  ( $P < 0.05$ ), a longer onset time ( $P < 0.01$ ) for the first action potential (AP) evoked  
205 by injecting a rheobase current and a longer AP half-width ( $P < 0.05$ ). Trains of spikes were  
206 elicited to examine the firing behavior. The AP adaptation ratio (2<sup>nd</sup> ISI/10<sup>th</sup> ISI) of CC PCs  
207 was smaller ( $P < 0.05$ ) than that of CT cells because they exhibited an initial spike burst.  
208 **(Fig. S2)**. The differences in passive and active electrophysiological properties found here  
209 are in accordance with previous studies (Kumar and Ohana, 2008; Tian et al., 2014).

210 Furthermore, the nuclear transcription factor Fork-head box protein P2 (FoxP2) is co-  
211 expressed with the neurotensin receptor 1 (NtsR1) gene, a molecular marker for CT L6A  
212 PCs in mice (Sundberg et al., 2018; Tasic et al., 2016). To identify the expression of FoxP2  
213 in L6A PCs, we performed whole-cell recordings with simultaneous filling of biocytin and  
214 fluorescent Alexa Fluor® 594 dye (n = 14). Subsequently, brain slices were processed for  
215 FoxP2 immunofluorescence staining. We found that CT L6A PCs were FoxP2-positive while  
216 CC PCs are FoxP2-negative **(Fig. S3a, b)**. The tight correlation between neuronal  
217 morphology, electrophysiology and FoxP2 expression demonstrates the reliability of  
218 classification based on axonal projection patterns of CC and CT PCs.

219 ACh at a concentration of 30  $\mu$ M was bath-applied to 63 morphological identified L6A  
220 neurons. CC L6A PCs showed a hyperpolarizing response with a mean amplitude of  $-1.76$   
221  $\pm 4.28$  mV (from  $-61.9 \pm 5.6$  mV to  $-63.6 \pm 7.0$  mV,  $P < 0.05$ , n = 35). In contrast, ACh (30  
222  $\mu$ M) induced a strong depolarization with a mean amplitude of  $+11.4 \pm 4.6$  mV (from  $-70.3 \pm$   
223  $5.1$  mV to  $-58.8 \pm 7.4$  mV,  $P < 0.001$ , n = 14) in CT PCs without exception **(Fig. 2c)**. In **Fig.**  
224 **2d**, ACh-induced membrane potential changes are plotted against the horizontal axonal field  
225 span revealing a strong correlation between axonal morphology and cholinergic response  
226 for the two L6A pyramidal cell types. In addition, by performing immunostaining we  
227 confirmed that  $M_4$ Rs were enriched within L6A. We found that  $M_4$ R-positive neurons were  
228 FoxP2-negative while virtually no FoxP2-positive neuron expressed  $M_4$ Rs **(Fig. S3d)**. This  
229 is consistent with our pharmacological result that only FoxP2-negative CC PCs showed a  
230  $M_4$ R-mediated hyperpolarization following ACh application **(Fig. S3)**.

231

### 232 **CT PCs are selectively activated by high concentrations of ACh via $\alpha 4\beta 2$ nAChRs**

233 As demonstrated above, the depolarizing and hyperpolarizing effects of ACh in L6A PCs  
234 can be attributed to the activation of  $M_1$  and  $M_4$  mAChRs, respectively **(Fig. 1c, d)**. However,  
235 previous studies have shown that ACh excites L6A excitatory neurons by activating nAChRs

236 (Bailey et al., 2012; Hay et al., 2016; Kassam et al., 2008; Poorthuis et al., 2013). In order  
 237 to investigate the functional role of nAChRs in L6A of rat barrel cortex, we perfused slices  
 238 continuously with 200 nM ATRO. Under this condition, 30  $\mu$ M ACh had no effect on both CC  
 239 and CT PCs ( $P > 0.05$  for CC cells,  $n = 5$ ;  $P > 0.05$  for CT cells,  $n = 5$ ) (**Fig. 3a**); application  
 240 of 1 mM ACh, however, strongly depolarized CT PCs ( $P < 0.001$ ,  $n = 12$ ) while CC PCs  
 241 showed no response ( $P > 0.05$ ,  $n = 4$ ; **Fig. 3b**). Our results demonstrate that both the  
 242 muscarinic and nicotinic modulation of L6A PCs is cell-type specific; nAChRs are present  
 243 solely in CT L6A PCs and activated substantially only by high ACh concentrations. To  
 244 determine the concentration range in which ACh activates postsynaptic nAChRs, we  
 245 measured the dose-response curve for ACh in the presence of 200 nM ATRO. A fit of dose-  
 246 response relationship to the Hill equation gave an  $EC_{50}$  of  $1.2 \pm 0.3$  mM ( $n = 5$ ) for the nicotinic  
 247 ACh response (**Fig. 3c**), a value more than about two orders of magnitude larger than those  
 248 of the de- and hyperpolarizing muscarinic response.

249 It has been reported that the expression of nAChR subtypes in the neocortex exhibits layer-  
 250 specificity. L6A PCs in prefrontal cortex show a slow inward current to ACh by activating  
 251 nAChRs containing the  $\alpha_4$  and  $\beta_2$  subunits (Hay et al., 2016; Poorthuis et al., 2013). To  
 252 confirm that this nAChR subtype mediates the response, the response of CT L6A PCs to  
 253 application of 1 mM ACh was recorded in an ATRO-containing perfusion solution. In the  
 254 presence of DH $\beta$ E (10  $\mu$ M), a nicotinic antagonist specific for  $\alpha_4\beta_2$  nAChRs, the ACh-  
 255 dependent depolarization in CT PCs was eliminated, suggesting that CT L6A PCs express  
 256 postsynaptic  $\alpha_4\beta_2$  subunit-containing nAChRs (**Fig. 3d**).

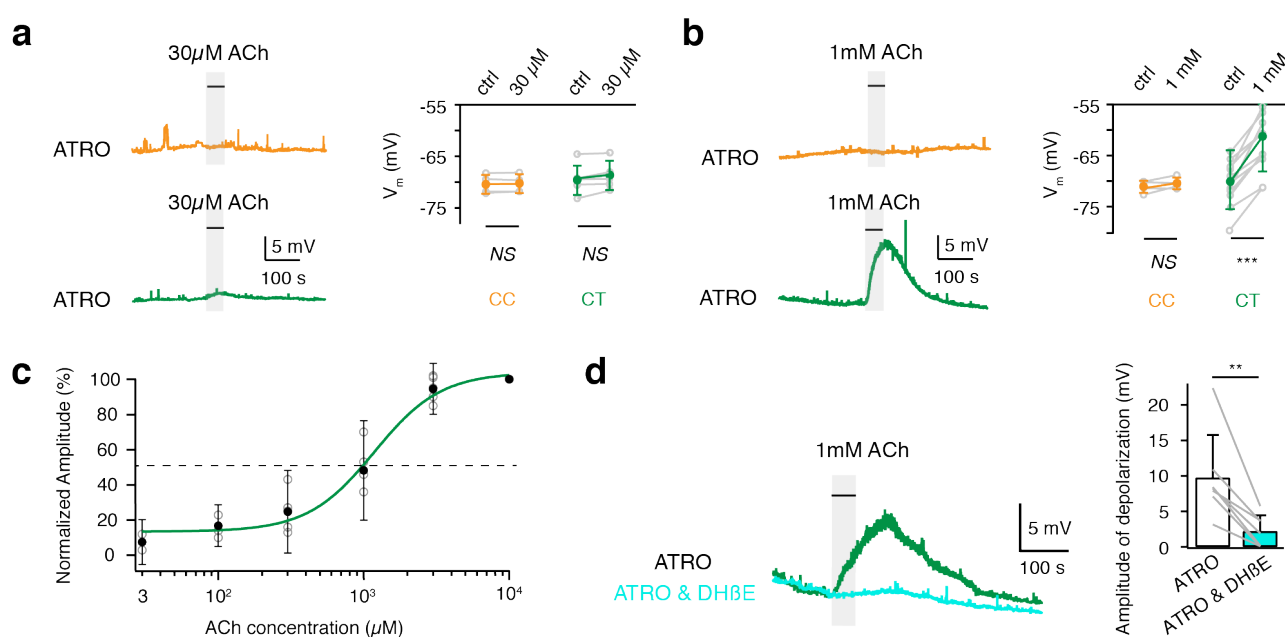

257 **Fig. 3 High concentration of ACh selectively depolarizes CT PCs.**

258 **(a)** In the presence of 200 nM atropine (ATRO), bath application of low concentration ACh  
259 (30  $\mu$ M, 50s) show no effect on either CC (top) or CT (bottom) PCs. Summary plots show  
260 the resting membrane potential ( $V_m$ ) under control and ACh conditions in L6A CC (n = 5, p  
261 = 0.188) and CT (n = 5, p = 0.0625) PCs. NS (not significant) for Wilcoxon signed-rank test.  
262 Error bars represent SD.

263 **(b)** In the presence of 200 nM ATRO, bath application of 1 mM ACh for 50s has no effect  
264 on CC L6A PCs (top) but induces a strong depolarization of CT L6A PCs (bottom). Summary  
265 plots showing  $V_m$  of CC L6A PCs under control conditions and in the presence of ACh in  
266 L6A CC (n = 5, p = 0.156) and CT (n = 12, p = 0.0002) PCs. Statistical analysis was performed  
267 using Wilcoxon signed-rank test. Error bars represent SD.

268 **(c)** The dose-response curve of ACh under ATRO application (200 nM) in CT PCs (n = 5) is  
269 well fitted by the Hill equation. The dashed line indicates the half maximal effect; the  
270 corresponding  $EC_{50}$  is 1.2 mM. Filled circles show mean effect of different concentrations  
271 while open circles represent individual values. Error bars represent SD.

272 **(d)** The depolarization induced by ACh application (in the presence of 200 nM ATRO) is  
273 blocked by 10  $\mu$ M of the specific antagonist of  $\alpha_4\beta_2$  subunit-containing nAChRs DH $\beta$ E in CT  
274 L6A PCs. Summary plots showing the amplitude of the depolarization in response to  
275 application of 1 mM ACh in the presence of ATRO alone (open bar) and ATRO together with  
276 DH $\beta$ E (n = 7, p = 0.0078 for Wilcoxon signed-rank test). Error bars represent SD.

277

278 **ACh differentially modulate miniature spontaneous activity of CC and CT L6A PCs**

279 In addition to changing the membrane properties and excitability of neurons, ACh is also a  
280 powerful modulator of neurotransmitter release. Therefore, we measured the amplitude and  
281 frequency of miniature spontaneous activity by performing whole-cell voltage-clamp  
282 recordings from L6A PCs. The membrane potential was held at -70 mV and inward miniature  
283 EPSCs (mEPSCs) were recorded in the presence of TTX (0.5  $\mu$ M) and gabazine (10  $\mu$ M).

284 We found that ACh differentially modulates miniature spontaneous activity in both L6A CC  
285 and CT PCs. The frequency but not the amplitude of mEPSCs in CC L6A PCs was  
286 significantly decreased by application of 30  $\mu$ M ACh ( $2.8 \pm 0.8$  vs.  $2.2 \pm 1.0$  Hz; n = 7, P <  
287 0.01), an effect that was blocked by the M<sub>4</sub>Rs antagonist tropicamide ( $2.2 \pm 1.0$  vs.  $2.8 \pm 1.0$   
288 Hz; n = 7, P < 0.01) (**Fig. 4a-c**). This suggests that ACh decreases the neurotransmitter  
289 release probability at synapses with CC L6A PCs via presynaptic M<sub>4</sub>Rs. Similarly, when  
290 DH $\beta$ E was co-applied with tropicamide and ACh, a reduction of mEPSC frequency without  
291 a change in mEPSC amplitude was observed (**Fig. S4**). This implies that in addition to M<sub>4</sub>Rs,  
292  $\alpha_4\beta_2$  nAChRs also play a role in the cholinergic modulation of excitatory synaptic  
293 transmission onto CC PCs.

294 In contrast to CC L6A PCs, application of 30  $\mu\text{M}$  ACh significantly decreased the inter-event  
 295 interval of mEPSCs in CT PCs, reflecting an increase in mEPSC frequency ( $0.95 \pm 0.36$  vs.  
 296  $2.12 \pm 0.68$  Hz;  $n = 7$ ,  $P < 0.01$ ) while the mEPSC amplitude remained unaffected. Because  
 297 ATRO did not affect the mEPSC frequency, we argued that the cholinergic effects on  
 298 spontaneous mEPSCs in CT L6A PCs were not mediated by mAChRs but exclusively by  
 299 presynaptic nAChRs. To test this, 10  $\mu\text{M}$  DH $\beta$ E was co-applied with ACh. In the presence  
 300 of DH $\beta$ E, the ACh-induced increase of mEPSCs frequency in CT L6A PCs was reduced to  
 301 control level ( $2.12 \pm 0.68$  vs.  $1.01 \pm 0.55$ ;  $n = 7$ ,  $P < 0.05$ ; **Fig. 4d-f**). These results suggest  
 302 that ACh potentiates excitatory synaptic transmission onto L6A CT PCs exclusively via  
 303 presynaptic  $\alpha_4\beta_2$  subunit containing nAChRs.

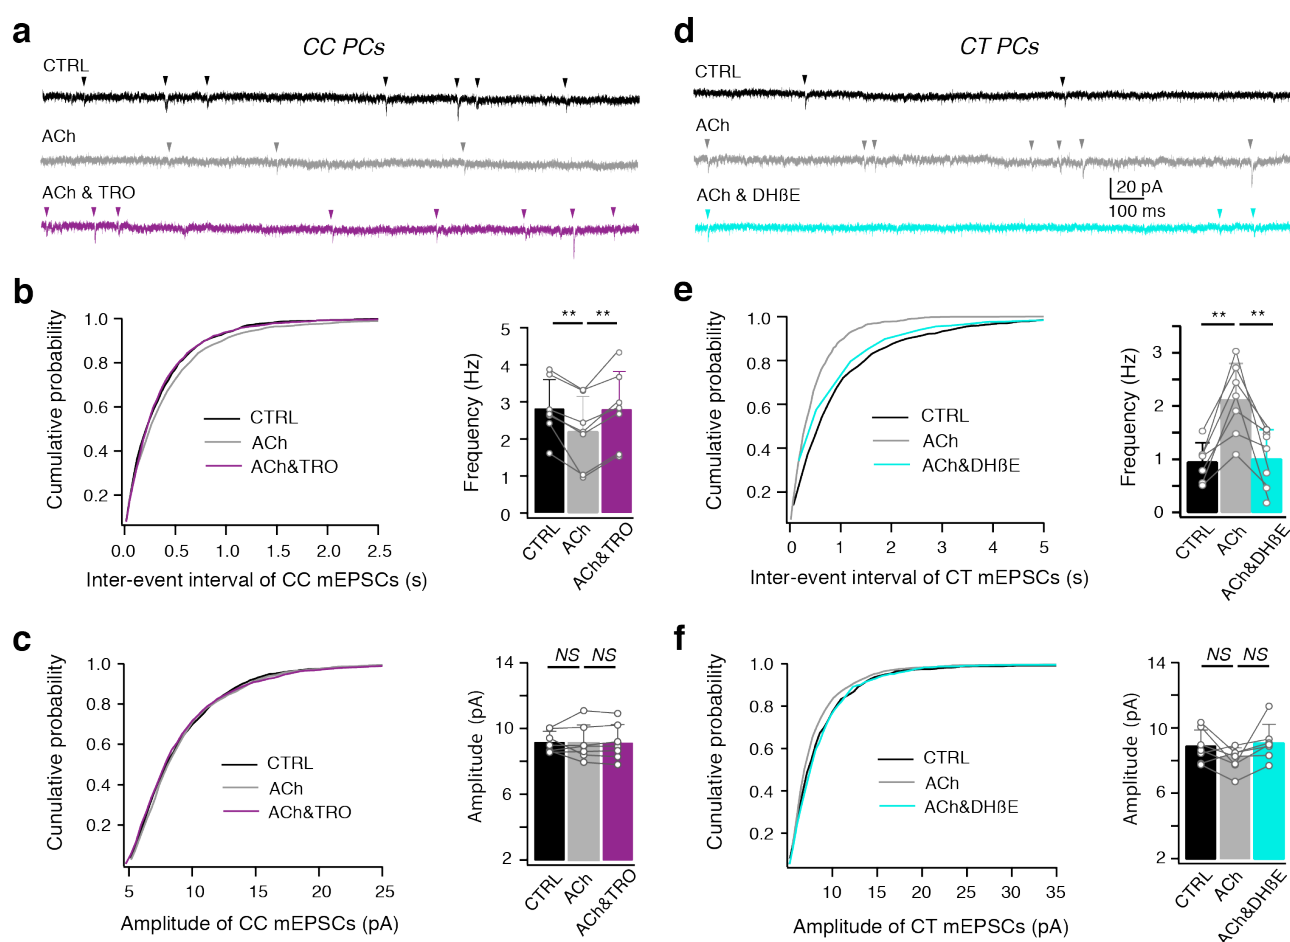

304

305 **Fig. 4 ACh differentially modulates miniature spontaneous activity in CC and CT L6A**  
 306 **PCs.**

307 **(a)** Example voltage-clamp recordings of a CC L6A PCs under control (black), bath  
 308 application of 30  $\mu\text{M}$  ACh (gray) and co-application of ACh and 1  $\mu\text{M}$  TRO (purple). Miniature  
 309 EPSCs were recorded in the presence of TTX (0.5  $\mu\text{M}$ ) and GABAzine (10  $\mu\text{M}$ ) at a holding  
 310 potential of -70 mV.

311 **(b)** Cumulative distributions of mEPSCs inter-event interval recorded in CC L6A PCs under  
 312 control condition, in the presence of ACh alone, and of ACh & TRO. Summary histograms

313 of mEPSC frequency are shown on the right. Control vs. ACh,  $p = 0.0078$ ; ACh vs. ACh &  
314 TRO,  $p = 0.0078$ ,  $n = 7$  for Wilcoxon signed-rank test. Error bars represent SD.

315 **(c)** Cumulative distributions of mEPSCs amplitude recorded in CC L6A PCs under control,  
316 ACh and ACh & TRO conditions. Summary histograms of mEPSC amplitude are shown on  
317 the right. Control vs. ACh,  $p = 0.8125$ ; ACh vs. ACh & TRO,  $p = 0.9375$ ,  $n = 7$  for Wilcoxon  
318 signed-rank test. Error bars represent SD.

319 **(d)** Example voltage-clamp recordings of a CT L6A PC in control (black), after bath  
320 application of 30  $\mu\text{M}$  ACh (gray) and subsequent co-application of ACh and 10  $\mu\text{M}$  DH $\beta$ E  
321 (turquoise). Miniature EPSCs were recorded in the presence of TTX (0.5  $\mu\text{M}$ ) and GABAzine  
322 (10  $\mu\text{M}$ ) at a holding potential of -70 mV.

323 **(e)** Cumulative distributions of mEPSCs inter-event interval recorded in CT L6A PCs under  
324 control, ACh and ACh & DH $\beta$ E conditions. Summary histograms of mEPSC frequency are  
325 shown on the right. Control vs. ACh,  $p = 0.0078$ ; ACh vs. ACh & DH $\beta$ E,  $p = 0.0078$ ,  $n = 7$   
326 for Wilcoxon signed-rank test. Error bars represent SD.

327 **(f)** Cumulative distributions of mEPSCs amplitude recorded in CT L6A PCs under control,  
328 ACh and ACh & DH $\beta$ E conditions. Summary histograms of mEPSC amplitude are shown  
329 on the right. Control vs. ACh,  $p = 0.4258$ ; ACh vs. ACh & DH $\beta$ E,  $p = 0.0781$ ,  $n = 7$  for  
330 Wilcoxon signed-rank test. Error bars represent SD.

331

### 332 **ACh induces a reduction of presynaptic neurotransmitter release in CC L6A PCs but** 333 **an an increase in CT PCs**

334 To elucidate cholinergic effects on L6A PCs at pre- and postsynaptic sites independently,  
335 paired recordings and simultaneous biocytin fillings of synaptically coupled L6A neurons  
336 were performed. Excitatory neurons were classified as either CT and CC PCs based on the  
337 criteria mentioned above. During recordings, inhibitory interneurons were preliminarily  
338 identified by their high frequency AP firing pattern. After reconstructions, interneurons were  
339 further distinguished based on morphological features such as lack of dendritic spines. 34  
340 excitatory connections were established by presynaptic CC PCs. We found that ACh  
341 suppresses the synaptic efficacy of neuronal connections established by presynaptic CC  
342 PCs regardless of the postsynaptic neuron type (**Fig. 5**). The unitary EPSP (uEPSP)  
343 amplitude of all synaptic connections with a presynaptic L6A CC PC were all significantly  
344 decreased by ACh (30  $\mu\text{M}$ ). For CC-CC connections the uEPSP amplitude decreased from  
345  $0.45 \pm 0.32$  mV to  $0.19 \pm 0.14$  mV ( $n = 20$  pairs,  $P < 0.001$ ) and for CC-CT connections  
346 changed from  $0.35 \pm 0.22$  mV to  $0.19 \pm 0.13$  mV ( $n = 5$  pairs,  $P < 0.05$ ). For CC-interneuron  
347 connections the mean uEPSP was reduced from  $0.90 \pm 0.90$  mV to  $0.52 \pm 0.58$  mV ( $n = 9$   
348 pairs,  $P < 0.05$ ) in the presence of ACh. ACh also significantly increased the paired-pulse  
349 ratio (PPR) of CC-CC ( $1.0 \pm 0.4$  vs.  $1.5 \pm 0.7$ ,  $P < 0.01$ ), CC-CT ( $1.2 \pm 0.7$  vs.  $2.1 \pm 1.6$ ,  $P <$   
350  $0.05$ ) and CC-interneuron ( $1.0 \pm 0.5$  vs.  $1.2 \pm 0.5$ ,  $P < 0.01$ ) connections. Following ACh

351 application, CC-CC connections and CC-interneuron connections showed an increase in the  
 352 CV; at CC-interneuron connections the failure rate was also significantly increased (**Fig. 5**  
 353 **e; Tab. S1**). These changes in the EPSP properties suggest that ACh decreases the  
 354 neurotransmitter release probability of intra-laminar connections established by a  
 355 presynaptic L6A CC PC. Other synaptic properties, like rise time, latency and decay time,  
 356 were not affected by ACh (**Tab. S1**).

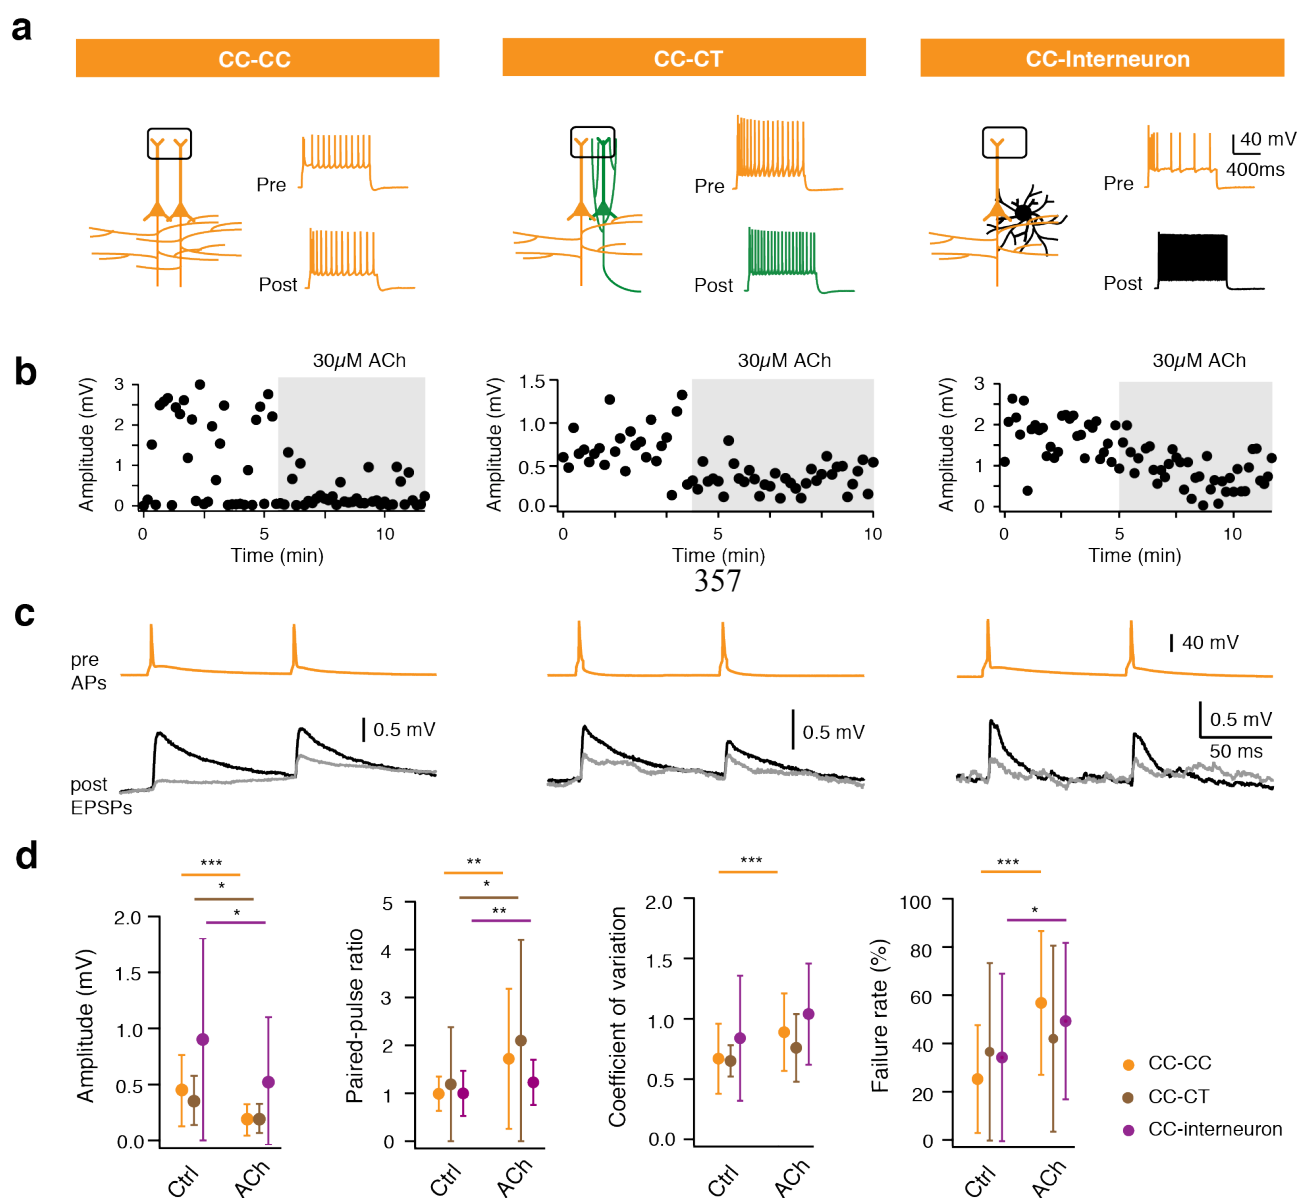

358

359

360 **Fig. 5 ACh-mediated reduction of presynaptic release at CC PC synapses.**

361 **(a)** Left, Schematic representation of the synaptic connections with a presynaptic CC L6A  
 362 PC. CC PCs are shown in orange, the CT PC in green and the interneuron in black. Barrel  
 363 structures indicate layer 4. Right, corresponding firing patterns of pre- and postsynaptic  
 364 neurons of the same connection type.

365 **(b)** Time course of EPSP amplitude changes following bath application of 30µM ACh (gray  
 366 phases) in a CC-CC, a CC-CT and a CC-interneuron pair.

367 **(c)** Overlay of average EPSPs in control (black) and ACh application (gray) phases.  
 368 Presynaptic APs are shown at the top. Data are recorded from the same pairs as in (b).  
 369 **(d)** The average and SD of several EPSP properties for CC-CC (n = 20), CC-CT (n = 5) and  
 370 CC-interneuron (n = 9) connections are shown. \*P < 0.05, \*\*P < 0.01, \*\*\*P < 0.001 for  
 371 Wilcoxon signed-rank test.

372

373 Previous studies have shown that ACh may inhibits intracortical excitatory synaptic  
 374 transmission at some synaptic connections through activation of presynaptic M<sub>4</sub> mAChRs  
 375 (Eggermann and Feldmeyer, 2009; Gil et al., 1997; Levy et al., 2006). To test whether the  
 376 ACh-induced suppression of the efficacy of synaptic connections with a presynaptic CC L6A  
 377 PC is mediated by M<sub>4</sub> mAChR activation, 1 μM TRO (a selective antagonist of M<sub>4</sub>Rs) was  
 378 co-applied with ACh (30 μM) after bath application of ACh alone. The effects of ACh on  
 379 synaptic connections established by CC PCs (n = 5 pairs, comprising 2 CC-CC, 1 CC-CT  
 380 and 2 CC-interneuron connections) were completely blocked by TRO. The EPSP amplitude  
 381 decreased to 36 ± 7% of control during ACh application and fully recovered to 100 ± 15 %  
 382 during co-application of ACh and TRO. Moreover, TRO also blocked the ACh effects on the  
 383 CV (0.8 ± 0.3 for control vs. 0.8 ± 0.3 for ACh and TRO; n = 5 pairs, P = 0.86) and failure  
 384 rate (26.7 ± 22.7 % for control vs. 24.1 ± 22.5 % for ACh and TRO; n = 5 pairs, P = 0.70)  
 385 **(Fig. 6)**. In addition to reversing the ACh-induced increase in the PPR, TRO increased the  
 386 PPR of connections established by CC PCs. Co-application of ACh and TRO resulted in a  
 387 smaller PPR compared to control (1.2 ± 0.4 vs. 1.5 ± 0.4; n = 5 pairs, P < 0.05) **(Fig. 6)**. In  
 388 order to isolate the presynaptic effect of ACh on L6A intra-laminar connections established

389

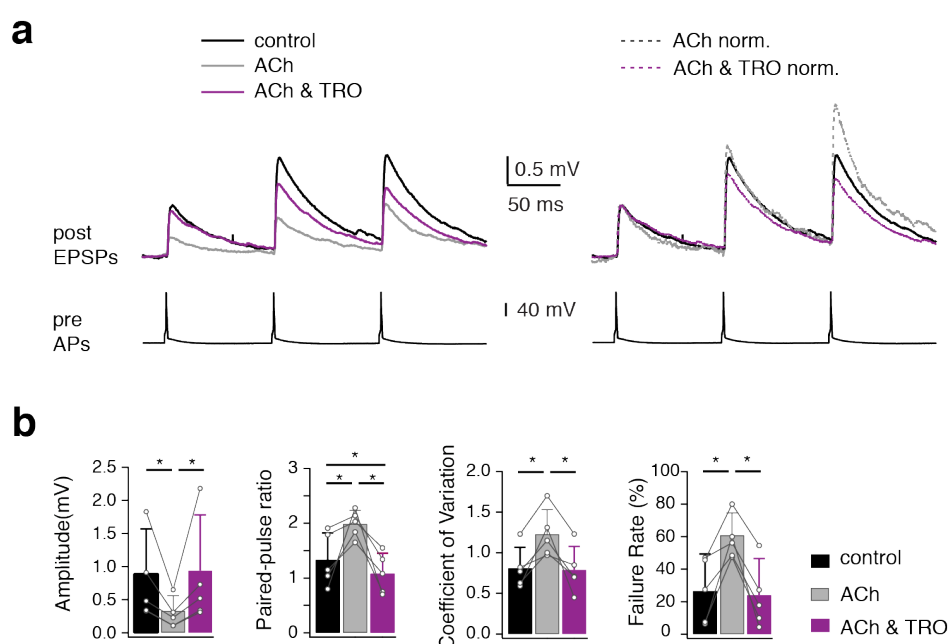

390 **Fig. 6 ACh decreases presynaptic release probability of CC PC via activation of M<sub>4</sub>**  
391 **AChRs.**

392 **(a)** left, Overlay of average EPSPs recorded in control, the presence of ACh (30 $\mu$ M), and of  
393 ACh & TRO (1  $\mu$ M) recorded from a representative CC-CC connection. Middle, normalising  
394 the mean EPSP amplitudes obtained in ACh and ACh & TRO to the first EPSPs amplitude  
395 in control reveals changes of PPR. Presynaptic APs are shown at the bottom.

396 **(b)** Histograms (n = 5) showing the effect of ACh and TRO blockade of ACh-induced  
397 changes on several EPSP properties including EPSP amplitude, PPR, CV and failure rate.  
398 Data were recorded from L6A synaptic connections with a presynaptic CC PC. Open circles,  
399 individual data points; bars, the average for each condition. Error bars represent SD. \*P <  
400 0.05 for Wilcoxon signed-rank test.

401

402 by presynaptic CC PCs, a CC-CT synaptically coupled pair was recorded. The ACh-induced  
403 reduction in synaptic release probability recovered only after co-application of TRO together  
404 with PIR but not when PIR (0.5  $\mu$ M) was applied alone (**Fig. S5**).

405 Because of their sparse and narrow axonal domain, L6A CT PCs rarely innervate neurons  
406 in their home layer and their intracortical synaptic connections are remarkably weak and  
407 unreliable (Crandall et al., 2017; Mercer et al., 2005; West et al., 2006). Here we applied  
408 ACh (30  $\mu$ M) to four synaptic connections established by a presynaptic CT PC in L6A,  
409 including one CT-CT, one CT-CC and two CT-interneuron connections. In all synaptic  
410 connections established by CT PCs ACh significantly enhanced the EPSP amplitude (0.10  
411  $\pm$  0.11 mV vs. 0.15  $\pm$  0.12 mV; n = 4 pairs, P < 0.05) and reduced the PPR (3.4  $\pm$  2.0 vs. 0.6  
412  $\pm$  0.1; n = 4 pairs, P < 0.05) (**Fig. 7**). The ACh-mediated reduction in the PPR suggests a  
413 presynaptic locus for synaptic modulation. No significant differences were detected in other  
414 uEPSP properties (**Tab. 1**). Our findings indicate that in contrast to the inhibition of  
415 presynaptic release in L6A CC PCs, ACh enhances the synaptic efficacy of the weak  
416 connections established by presynaptic CT PC.

417 To determine the AChR subtype that mediates the increase in synaptic efficacy at these  
418 connections, we tested whether the selective antagonist of M<sub>1</sub>Rs (PIR) and the general  
419 antagonist of nAChRs mecamylamine (MEC) could block the effect of ACh on a synaptic  
420 connection with a presynaptic CT PC. While PIR had no effect, MEC blocked the increase  
421 of EPSP amplitude and decrease of PPR in a CT-CC pair (**Fig. S6**) indicating that the ACh-  
422 induced enhancement of synaptic efficacy is induced by activation of nAChRs in presynaptic  
423 CT PCs.

424



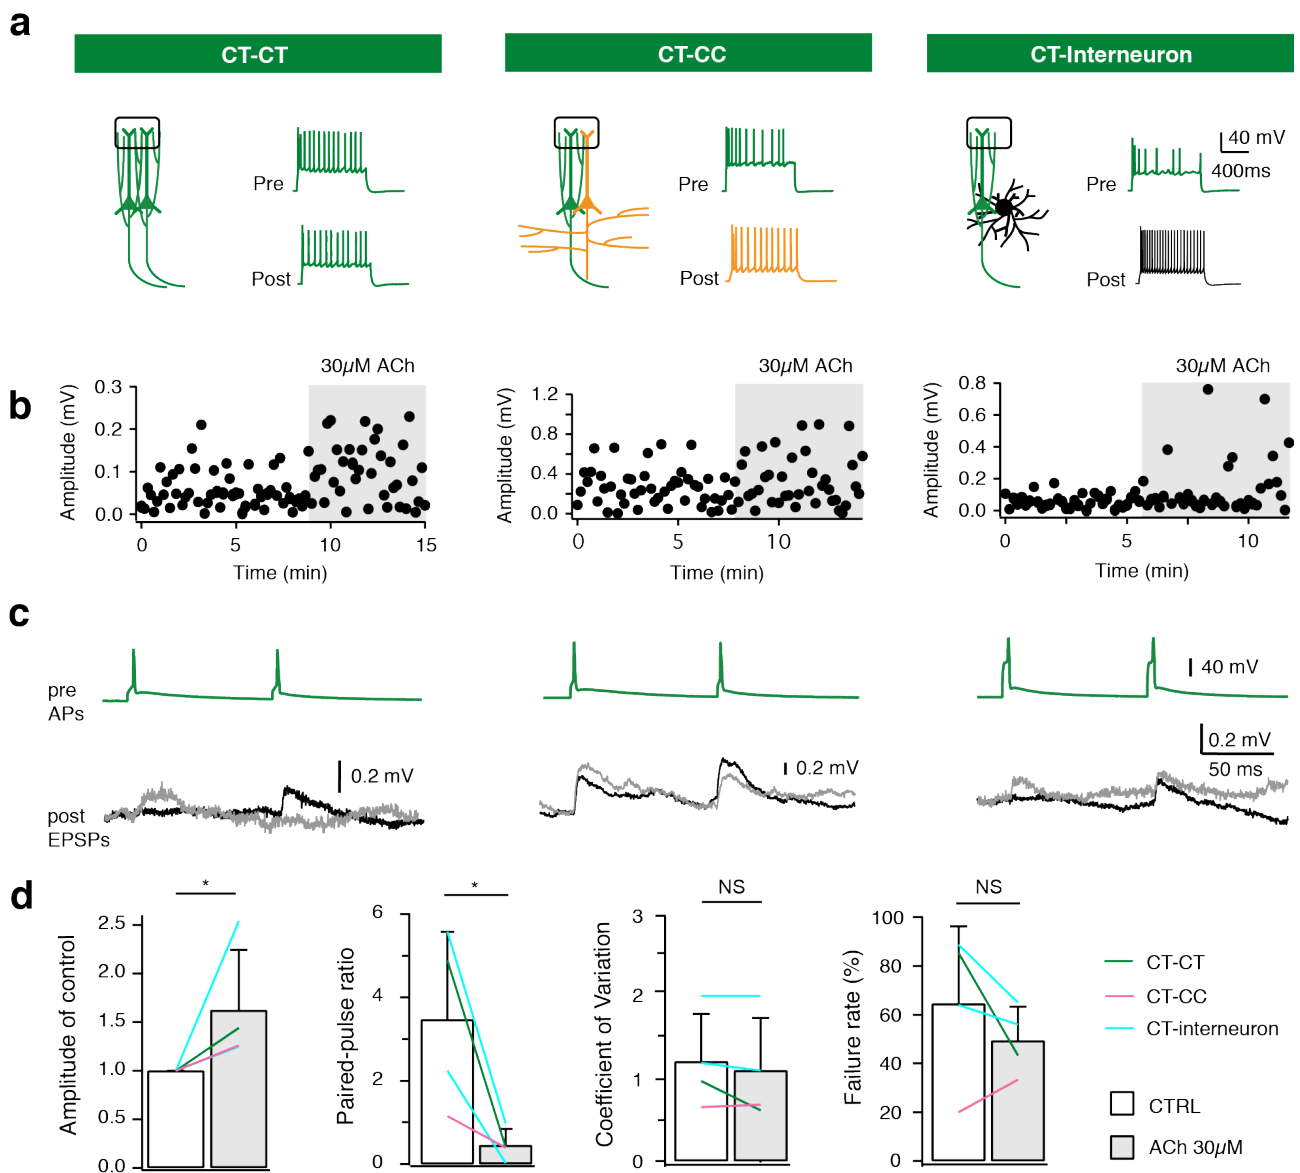

425

426

427 **Fig. 7 ACh enhances synaptic efficacy of L6A excitatory connections with a**  
 428 **presynaptic CT PC.**

429 **(a)** Left, schematic representation of the synaptic connections with a presynaptic CT PC.  
 430 Color code as in Fig. 5. Barrel structures indicate layer 4. Right, corresponding firing patterns  
 431 of pre- and postsynaptic neurons of the same connection type.

432 **(b)** Time course of EPSP amplitude change following bath application of 30  $\mu$ M ACh in a  
 433 CT-CT, CT-CC, and CT-interneuron pair.

434 **(c)** Overlay of average EPSPs in control (black) and ACh application (gray) phases.  
 435 Presynaptic APs are shown at the top. Data are recorded from the same pairs as in (b).

436 **(d)** Summary data (n = 4) of ACh-induced changes in several uEPSP properties for L6A  
 437 excitatory pairs with a presynaptic CT L6A PC. Open circles, individual data points; bars,  
 438 the average for each condition. Error bars represent SD. \*P < 0.05 for Mann-Whitney U-test.

439

## 440 **Discussion**

441 We investigated the cholinergic modulation of CT and CC PCs in layer 6A of the barrel  
442 cortex. We showed that (i) low concentrations of ACh differentially modulate the L6A  
443 microcircuitry by persistently depolarizing CT but hyperpolarizing CC L6A PCs. These  
444 effects are monophasic and mediated via  $M_1$  and  $M_4$  mAChRs, respectively; (ii) a nicotinic  
445 ACh response was observed exclusively in CT PCs only when a high ACh concentration  
446 was applied. In addition, (iii) low concentrations of ACh increases the frequency of miniature  
447 EPSCs via presynaptic nAChRs in L6A CT but decreases that of CC PCs via  $M_4$ Rs. To  
448 better understand the effects of ACh on intralaminar synaptic transmission, recordings were  
449 performed from synaptically coupled L6A PC pairs. We found that (iv) in neuronal  
450 connections with a presynaptic CC PC the neurotransmitter release probability was reduced  
451 via activation of  $M_4$ Rs but (v) increased in connections with a presynaptic CT L6A neuron  
452 by nAChR activation. Our results reveal that two functionally and morphologically distinct  
453 subpopulations of L6A PCs are affected differentially by ACh acting on both mAChRs and  
454 nAChRs.

## 455 456 **Synergistic modulation of L6A PCs by mAChRs and nAChRs**

457 In a number of studies investigating the nAChR response of L6 PCs in different cortical  
458 areas only high ACh concentration ( $\geq 1$  mM) have been applied because the ACh affinity of  
459 nAChRs is substantially lower than that of mAChRs (Bailey et al., 2012; Hay et al., 2016;  
460 Kassam et al., 2008; Poorthuis et al., 2013). Under this condition any mAChR effect is almost  
461 entirely masked by the strong nicotinic response so that any involvement of mAChRs has  
462 been explicitly ruled out. Here we demonstrate for the first time that mAChRs play crucial  
463 roles in both pre- and postsynaptic modulation of L6A PC activity. Both the pre- and  
464 postsynaptic effects of mAChRs are already present at low ACh concentrations (1-10  $\mu$ M)  
465 suggesting that neuromodulation via mAChRs is tonically present and mediated by volume  
466 transmission (Parikh et al., 2007; Sarter et al., 2009). On the other hand, only a high  
467 concentration of ACh ( $EC_{50}$  of  $\sim 1$  mM) could effectively depolarize CT L6A PCs via nAChRs,  
468 but an up-regulation of presynaptic vesicle release via  $\alpha_4\beta_2$  subunit-containing nAChRs was  
469 already observed following 30  $\mu$ M ACh application. This  $\alpha_4\beta_2$  nAChR-mediated effect was  
470 found for spontaneous excitatory synaptic activity as well as for CT-formed monosynaptic  
471 connections, suggesting a presynaptic nAChR expression on synaptic boutons of both  
472 glutamatergic afferents and CT L6A axons. It is conceivable that these presynaptic nAChRs  
473 are more ACh sensitive than those located at postsynaptic sites. In the enteric nervous

474 system, for example, presynaptic nAChRs in myenteric neurons were found to be more  
475 sensitive to exogenous ligands than somatodendritic nAChRs (Mandl and Kiss, 2007).  
476 Furthermore, in some L6 PCs the  $\alpha_5$  nAChR subunit co-assembles with the  $\alpha_4$  and  $\beta_2$   
477 subunits (Hay et al., 2016; Poorthuis et al., 2013). Nicotinic AChRs containing the  $\alpha_4$ ,  $\beta_2$  and  
478  $\alpha_5$  subunits have a higher  $\text{Ca}^{2+}$  permeability than  $\alpha_4\beta_2$  nAChRs (Fucile, 2004). In the  
479 presynaptic terminals,  $\text{Ca}^{2+}$  entry via  $\alpha_4\beta_2\alpha_5$  nAChRs at the synaptic bouton could increase  
480 the neurotransmitter release provided these receptor channels are located sufficiently close  
481 to the release site.

482 In the cortex, ACh levels change dramatically during different stages of waking and sleep  
483 (Himmelheber et al., 2000; Teles-Grilo Ruivo et al., 2017). It has been suggested that high  
484 ACh levels serve to enhance the response to sensory stimuli by increasing the strength of  
485 afferent input; while low concentration of ACh contributes in the consolidation of encoded  
486 information (Hasselmo and McGaughy, 2004). Cholinergic signalling has been described to  
487 occur via a volume release mechanism (Sarter et al., 2009), which is slow and unspecific.  
488 Volume release of ACh reaches concentrations in a low micromolar range, spreads widely  
489 over neocortical layers and activates predominantly mAChRs. In addition, cholinergic  
490 synapses have been identified particularly in deep layers of neocortex and less so in  
491 superficial cortical layers (Bennett et al., 2012; Hay et al., 2016; Hedrick and Waters, 2015).  
492 At these cholinergic synapses, ACh reaches a high concentration in the synaptic cleft,  
493 thereby activating postsynaptic nAChRs in L6 PCs (Hay et al., 2016). Because cholinergic  
494 synapses in the neocortex are small (Takacs et al., 2013), ACh released into the synaptic  
495 cleft may spill over into the perisynaptic space. Subsequently the extra-synaptic AChRs on  
496 presynaptic boutons of CT PCs are activated resulting in an increase of release probability  
497 (**Fig. 7**). Thus, nAChRs and mAChRs act on different time scales and at different  
498 neurotransmitter concentrations, resulting in a striking complexity of the cholinergic  
499 modulation of neocortical signaling.

500

### 501 **The cell type-specific effect of ACh in L6A**

502 ACh has been shown to induce a persistent depolarizations of L2/3 and L5 PCs but a  
503 hyperpolarization of excitatory L4 neurons (Dasari et al., 2017; Eggermann and Feldmeyer,  
504 2009; Gullledge et al., 2007). Here, we demonstrate that ACh modulates PCs not only in a  
505 layer-specific but also a cell type-specific way that can be attributed to a cell type-dependent  
506 expression of mAChRs (**Fig. 8**). In L6A of barrel cortex, ACh hyperpolarizes CC PCs but  
507 depolarizes CT PCs via activation of  $M_4$ Rs and  $M_1$ Rs, respectively. The action potential firing

508 frequency was decreased by ACh in CC PCs but increased in CT PCs, thereby modulating  
509 the excitability and signal propagation in L6A PCs in a cell-specific manner. In addition, CT  
510 L6A PCs but not CC PCs showed a strong  $\alpha_4\beta_2$  nAChR-mediated response (**Fig. 8**). This is  
511 consistent with previous findings in L6 of prefrontal cortex that regular spiking neurons have  
512 a larger nicotinic receptor-mediated inward current following ACh application when  
513 compared with bursting neurons (Kassam et al., 2008). A cell type-specific neuromodulation  
514 was also discovered previously in deep layers of medial prefrontal cortex for other  
515 neuromodulators like noradrenaline, dopamine and adenosine (Anastasiades et al., 2018;  
516 Baker et al., 2018; Clarkson et al., 2017; Dembrow et al., 2010; van Aerde et al., 2013). It  
517 should be noted that a subset of CC PCs showed no or only a very small depolarization  
518 following ACh application (~35%). This variability may result from the neuronal diversity of  
519 L6A CC PCs. It has been shown that different subtypes of CC PCs exist, which can be  
520 differentiated on the basis of their dendritic and axonal arborization (e.g. inverted, bipolar  
521 cells and short pyramids) (Pichon et al., 2012; Zhang and Deschenes, 1997).

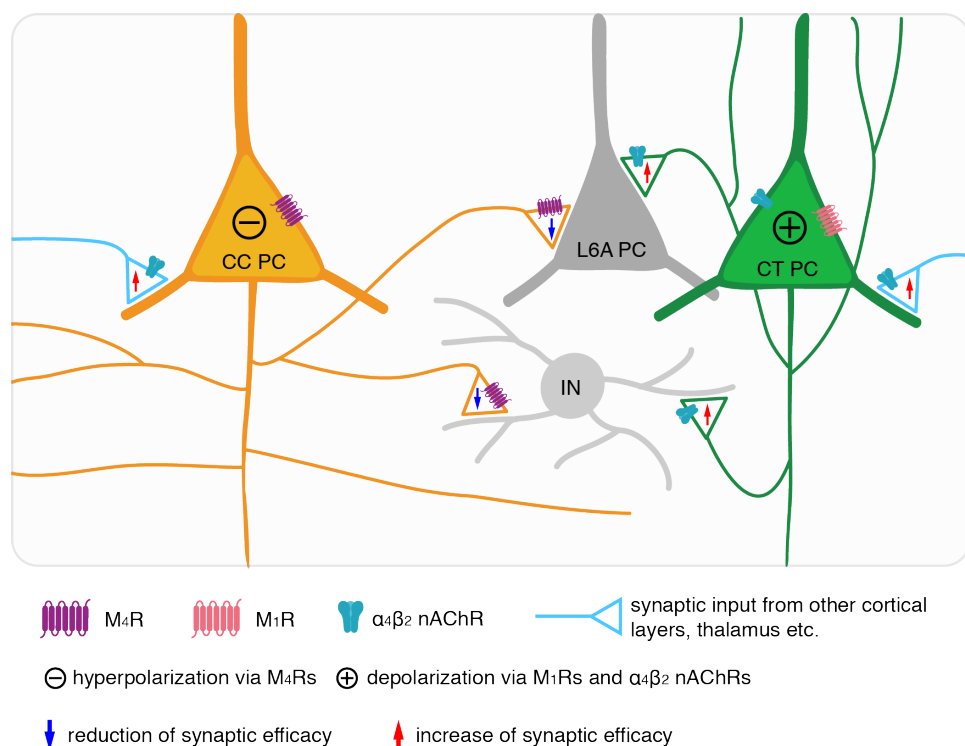

530 By studying miniature spontaneous activity of L6A CC and CT PCs, we found that ACh both  
531 increases the excitatory synaptic release onto CC and CT PCs by activation of  $\alpha_4\beta_2$  nAChRs  
532 (**Fig. 8**). Because CT PCs express  $\alpha_4\beta_2$  nAChRs, an increase in spontaneous activity may  
533 result from the enhanced release probability at CT L6 PC boutons; however, the intracortical  
534 axon density of these PCs is low so that their contribution to the spontaneous mEPSC  
535 frequency is minimal. On the other hand, activation of nAChRs increases thalamocortical  
536 transmission onto L3, L4 and L5 neocortical neurons (Gil et al., 1997; Kawai et al., 2007;  
537 Lambe et al., 2003). Thus, the increased excitatory transmission onto L6A PCs is probably  
538 resulting to a large degree from a higher release probability at thalamocortical and less so  
539 from intracortical synapses. In addition, CC PCs receive more intra-laminar inputs than CT  
540 PCs, which can be suppressed by ACh via  $M_4$ Rs. Therefore, the ACh-induced reduction of  
541 mEPSC frequency in CC PCs could be a combinatorial effect on thalamocortical and  
542 intracortical transmission.

543 It has been proposed that ACh increases the signal-to-noise ratio (SNR) of sensory signaling  
544 by selectively enhancing thalamocortical inputs over intracortical synaptic transmission (Gil  
545 et al., 1997; Hsieh et al., 2000; Oldford and Castro-Alamancos, 2003). ACh has been found  
546 to suppress the efficacy of excitatory intracortical connections in different layers including  
547 L2/3, L4 and L5 (Eggermann and Feldmeyer, 2009; Gil et al., 1997; Levy et al., 2006). Here,  
548 a differential cholinergic modulation of presynaptic neurotransmitter release was observed  
549 in CC and CT L6A PC types. ACh suppresses synaptic transmission in L6A excitatory  
550 connections with presynaptic CC PCs through activation of  $M_4$ Rs but potentiates  
551 connections with a presynaptic CT PCs via presynaptic nAChRs (**Fig. 8**); no  $M_1$ R effect on  
552 synaptic transmission was observed.

553 In hippocampus and some subcortical structures such as the ventral tegmental area,  
554 glutamatergic synapses are known to be facilitated by nAChRs located on presynaptic  
555 terminals (Gray et al., 1996; Mansvelder and McGehee, 2000). However, very few studies  
556 demonstrate an ACh-mediated enhancement of intracortical excitatory synaptic  
557 transmission. Recently, it has been shown that excitatory synaptic transmission between  
558 PCs and somatostatin-positive interneurons in layer 2 of mouse barrel cortex is increased  
559 by ACh via activating nAChRs (Urban-Ciecko et al., 2018). Although an increase of synaptic  
560 efficacy was observed in connections with a presynaptic CT PCs, this type of synaptic  
561 connections are rare, generally weak and very unreliable (Crandall et al., 2017; West et al.,  
562 2006). Therefore we propose that ACh mainly acts on CT PCs not primarily by increasing  
563 intracortical synaptic transmission but rather by facilitating corticothalamocortical feedback;  
564 this facilitation will occur already at ACh levels in the low micromolar range.

565 **Funding**

566 This work was supported by the Helmholtz Society, the DFG Research Group - BaCoFun  
567 (grant no. Fe471/4-2 to D.F.), the European Union's Horizon 2020 Research, Innovation  
568 Programme under Grant Agreement No. 720270 (HBP SGA1; to DF) and the China  
569 Scholarship Council (to D.Y.).

570

571 **Acknowledgement**

572 We thank Werner Hucko for excellent technical assistance and Dr. Dr. Karlijn van Aerde for  
573 custom-written macros in Igor Pro software. We warmly thank Dr. Chao Ding for helpful  
574 discussions and Dr. Vishalini Emmenegger for proofreading the manuscript.

575 **References**

- 576 Agmon, A., and Connors, B.W. (1991). Thalamocortical responses of mouse somatosensory  
577 (barrel) cortex in vitro. *Neuroscience* 41, 365-379.
- 578 Alves, N.C., Bailey, C.D., Nashmi, R., and Lambe, E.K. (2010). Developmental sex  
579 differences in nicotinic currents of prefrontal layer VI neurons in mice and rats. *PLoS One* 5,  
580 e9261.
- 581 Anastasiades, P.G., Boada, C., and Carter, A.G. (2018). Cell-Type-Specific D1 Dopamine  
582 Receptor Modulation of Projection Neurons and Interneurons in the Prefrontal Cortex. *Cereb*  
583 *Cortex*.
- 584 Bailey, C.D., Alves, N.C., Nashmi, R., De Biasi, M., and Lambe, E.K. (2012). Nicotinic alpha5  
585 subunits drive developmental changes in the activation and morphology of prefrontal cortex  
586 layer VI neurons. *Biol Psychiatry* 71, 120-128.
- 587 Baker, A.L., O'Toole, R.J., and Gullledge, A.T. (2018). Preferential cholinergic excitation of  
588 corticopontine neurons. *J Physiol* 596, 1659-1679.
- 589 Beierlein, M., and Connors, B.W. (2002). Short-term dynamics of thalamocortical and  
590 intracortical synapses onto layer 6 neurons in neocortex. *J Neurophysiol* 88, 1924-1932.
- 591 Bennett, C., Arroyo, S., Berns, D., and Hestrin, S. (2012). Mechanisms generating dual-  
592 component nicotinic EPSCs in cortical interneurons. *J Neurosci* 32, 17287-17296.
- 593 Clarkson, R.L., Liptak, A.T., Gee, S.M., Sohal, V.S., and Bender, K.J. (2017). D3 Receptors  
594 Regulate Excitability in a Unique Class of Prefrontal Pyramidal Cells. *J Neurosci* 37, 5846-  
595 5860.
- 596 Constantinople, C.M., and Bruno, R.M. (2013). Deep cortical layers are activated directly by  
597 thalamus. *Science* 340, 1591-1594.
- 598 Crandall, S.R., Patrick, S.L., Cruikshank, S.J., and Connors, B.W. (2017). Infrabarrels Are  
599 Layer 6 Circuit Modules in the Barrel Cortex that Link Long-Range Inputs and Outputs. *Cell*  
600 *Rep* 21, 3065-3078.
- 601 Dasari, S., Hill, C., and Gullledge, A.T. (2017). A unifying hypothesis for M1 muscarinic  
602 receptor signalling in pyramidal neurons. *J Physiol* 595, 1711-1723.
- 603 Dasgupta, R., Seibt, F., and Beierlein, M. (2018). Synaptic Release of Acetylcholine Rapidly  
604 Suppresses Cortical Activity by Recruiting Muscarinic Receptors in Layer 4. *J Neurosci* 38,  
605 5338-5350.

- 606 Dembrow, N.C., Chitwood, R.A., and Johnston, D. (2010). Projection-specific  
607 neuromodulation of medial prefrontal cortex neurons. *The Journal of neuroscience : the*  
608 *official journal of the Society for Neuroscience* 30, 16922-16937.
- 609 Desai, N.S., and Walcott, E.C. (2006). Synaptic bombardment modulates muscarinic effects  
610 in forelimb motor cortex. *J Neurosci* 26, 2215-2226.
- 611 Dodt, H.U., and Zieglgansberger, W. (1990). Visualizing unstained neurons in living brain  
612 slices by infrared DIC-videomicroscopy. *Brain Res* 537, 333-336.
- 613 Eckenstein, F.P., Baughman, R.W., and Quinn, J. (1988). An anatomical study of cholinergic  
614 innervation in rat cerebral cortex. *Neuroscience* 25, 457-474.
- 615 Eggermann, E., and Feldmeyer, D. (2009). Cholinergic filtering in the recurrent excitatory  
616 microcircuit of cortical layer 4. *Proc Natl Acad Sci U S A* 106, 11753-11758.
- 617 Feldmeyer, D., Egger, V., Lubke, J., and Sakmann, B. (1999). Reliable synaptic connections  
618 between pairs of excitatory layer 4 neurones within a single 'barrel' of developing rat  
619 somatosensory cortex. *J Physiol* 521 Pt 1, 169-190.
- 620 Fucile, S. (2004). Ca<sup>2+</sup> permeability of nicotinic acetylcholine receptors. *Cell Calcium* 35, 1-  
621 8.
- 622 Gil, Z., Connors, B.W., and Amitai, Y. (1997). Differential regulation of neocortical synapses  
623 by neuromodulators and activity. *Neuron* 19, 679-686.
- 624 Gray, R., Rajan, A.S., Radcliffe, K.A., Yakehiro, M., and Dani, J.A. (1996). Hippocampal  
625 synaptic transmission enhanced by low concentrations of nicotine. *Nature* 383, 713-716.
- 626 Gullledge, A.T., and Kawaguchi, Y. (2007). Phasic cholinergic signaling in the hippocampus:  
627 functional homology with the neocortex? *Hippocampus* 17, 327-332.
- 628 Gullledge, A.T., Park, S.B., Kawaguchi, Y., and Stuart, G.J. (2007). Heterogeneity of phasic  
629 cholinergic signaling in neocortical neurons. *J Neurophysiol* 97, 2215-2229.
- 630 Gullledge, A.T., and Stuart, G.J. (2005). Cholinergic inhibition of neocortical pyramidal  
631 neurons. *J Neurosci* 25, 10308-10320.
- 632 Hasselmo, M.E. (2006). The role of acetylcholine in learning and memory. *Curr Opin*  
633 *Neurobiol* 16, 710-715.
- 634 Hasselmo, M.E., and McGaughy, J. (2004). High acetylcholine levels set circuit dynamics  
635 for attention and encoding and low acetylcholine levels set dynamics for consolidation. *Prog*  
636 *Brain Res* 145, 207-231.
- 637 Hasselmo, M.E., and Sarter, M. (2011). Modes and models of forebrain cholinergic  
638 neuromodulation of cognition. *Neuropsychopharmacology* 36, 52-73.



- 639 Hay, Y.A., Lambolez, B., and Tricoire, L. (2016). Nicotinic Transmission onto Layer 6  
640 Cortical Neurons Relies on Synaptic Activation of Non-alpha7 Receptors. *Cereb Cortex* 26,  
641 2549-2562.
- 642 Hedrick, T., and Waters, J. (2015). Acetylcholine excites neocortical pyramidal neurons via  
643 nicotinic receptors. *J Neurophysiol* 113, 2195-2209.
- 644 Henny, P., and Jones, B.E. (2008). Projections from basal forebrain to prefrontal cortex  
645 comprise cholinergic, GABAergic and glutamatergic inputs to pyramidal cells or  
646 interneurons. *Eur J Neurosci* 27, 654-670.
- 647 Himmelheber, A.M., Sarter, M., and Bruno, J.P. (2000). Increases in cortical acetylcholine  
648 release during sustained attention performance in rats. *Brain Res Cogn Brain Res* 9, 313-  
649 325.
- 650 Hsieh, C.Y., Cruikshank, S.J., and Metherate, R. (2000). Differential modulation of auditory  
651 thalamocortical and intracortical synaptic transmission by cholinergic agonist. *Brain Res*  
652 880, 51-64.
- 653 Jones, B.E. (2004). Activity, modulation and role of basal forebrain cholinergic neurons  
654 innervating the cerebral cortex. *Prog Brain Res* 145, 157-169.
- 655 Kalmbach, A., Hedrick, T., and Waters, J. (2012). Selective optogenetic stimulation of  
656 cholinergic axons in neocortex. *J Neurophysiol* 107, 2008-2019.
- 657 Kassam, S.M., Herman, P.M., Goodfellow, N.M., Alves, N.C., and Lambe, E.K. (2008).  
658 Developmental excitation of corticothalamic neurons by nicotinic acetylcholine receptors. *J*  
659 *Neurosci* 28, 8756-8764.
- 660 Kawai, H., Lazar, R., and Metherate, R. (2007). Nicotinic control of axon excitability  
661 regulates thalamocortical transmission. *Nat Neurosci* 10, 1168-1175.
- 662 Kumar, P., and Ohana, O. (2008). Inter- and intralaminar subcircuits of excitatory and  
663 inhibitory neurons in layer 6a of the rat barrel cortex. *J Neurophysiol* 100, 1909-1922.
- 664 Lambe, E.K., Picciotto, M.R., and Aghajanian, G.K. (2003). Nicotine induces glutamate  
665 release from thalamocortical terminals in prefrontal cortex. *Neuropsychopharmacology* 28,  
666 216-225.
- 667 Levy, R.B., Reyes, A.D., and Aoki, C. (2006). Nicotinic and muscarinic reduction of unitary  
668 excitatory postsynaptic potentials in sensory cortex; dual intracellular recording in vitro. *J*  
669 *Neurophysiol* 95, 2155-2166.
- 670 Lubke, J., and Feldmeyer, D. (2007). Excitatory signal flow and connectivity in a cortical  
671 column: focus on barrel cortex. *Brain Struct Funct* 212, 3-17.

- 672 Ma, S., Hangya, B., Leonard, C.S., Wisden, W., and Gundlach, A.L. (2018). Dual-transmitter  
673 systems regulating arousal, attention, learning and memory. *Neurosci Biobehav Rev* 85, 21-  
674 33.
- 675 Mandl, P., and Kiss, J.P. (2007). Role of presynaptic nicotinic acetylcholine receptors in the  
676 regulation of gastrointestinal motility. *Brain Res Bull* 72, 194-200.
- 677 Mansvelder, H.D., and McGehee, D.S. (2000). Long-term potentiation of excitatory inputs to  
678 brain reward areas by nicotine. *Neuron* 27, 349-357.
- 679 Marx, M., Gunter, R.H., Hucko, W., Radnikow, G., and Feldmeyer, D. (2012). Improved  
680 biocytin labeling and neuronal 3D reconstruction. *Nat Protoc* 7, 394-407.
- 681 McCormick, D.A., and Prince, D.A. (1985). Two types of muscarinic response to  
682 acetylcholine in mammalian cortical neurons. *Proc Natl Acad Sci U S A* 82, 6344-6348.
- 683 Mednikova, Y.S., Karnup, S.V., and Loseva, E.V. (1998). Cholinergic excitation of dendrites  
684 in neocortical neurons. *Neuroscience* 87, 783-796.
- 685 Mercer, A., West, D.C., Morris, O.T., Kirchhecker, S., Kerkhoff, J.E., and Thomson, A.M.  
686 (2005). Excitatory connections made by presynaptic cortico-cortical pyramidal cells in layer  
687 6 of the neocortex. *Cereb Cortex* 15, 1485-1496.
- 688 Mesulam, M.M., Mufson, E.J., Wainer, B.H., and Levey, A.I. (1983). Central cholinergic  
689 pathways in the rat: an overview based on an alternative nomenclature (Ch1-Ch6).  
690 *Neuroscience* 10, 1185-1201.
- 691 Meyer, H.S., Wimmer, V.C., Oberlaender, M., de Kock, C.P., Sakmann, B., and  
692 Helmstaedter, M. (2010). Number and laminar distribution of neurons in a thalamocortical  
693 projection column of rat vibrissal cortex. *Cereb Cortex* 20, 2277-2286.
- 694 Narayanan, R.T., Egger, R., Johnson, A.S., Mansvelder, H.D., Sakmann, B., de Kock, C.P.,  
695 and Oberlaender, M. (2015). Beyond Columnar Organization: Cell Type- and Target Layer-  
696 Specific Principles of Horizontal Axon Projection Patterns in Rat Vibrissal Cortex. *Cereb*  
697 *Cortex* 25, 4450-4468.
- 698 Oberlaender, M., de Kock, C.P., Bruno, R.M., Ramirez, A., Meyer, H.S., Dercksen, V.J.,  
699 Helmstaedter, M., and Sakmann, B. (2012). Cell type-specific three-dimensional structure  
700 of thalamocortical circuits in a column of rat vibrissal cortex. *Cereb Cortex* 22, 2375-2391.
- 701 Obermayer, J., Verhoog, M.B., Luchicchi, A., and Mansvelder, H.D. (2017). Cholinergic  
702 Modulation of Cortical Microcircuits Is Layer-Specific: Evidence from Rodent, Monkey and  
703 Human Brain. *Front Neural Circuits* 11, 100.

- 704 Oldford, E., and Castro-Alamancos, M.A. (2003). Input-specific effects of acetylcholine on  
705 sensory and intracortical evoked responses in the "barrel cortex" in vivo. *Neuroscience* 117,  
706 769-778.
- 707 Parikh, V., Kozak, R., Martinez, V., and Sarter, M. (2007). Prefrontal acetylcholine release  
708 controls cue detection on multiple timescales. *Neuron* 56, 141-154.
- 709 Paul, S., Jeon, W.K., Bizon, J.L., and Han, J.S. (2015). Interaction of basal forebrain  
710 cholinergic neurons with the glucocorticoid system in stress regulation and cognitive  
711 impairment. *Front Aging Neurosci* 7, 43.
- 712 Pichon, F., Nikonenko, I., Kraftsik, R., and Welker, E. (2012). Intracortical connectivity of  
713 layer VI pyramidal neurons in the somatosensory cortex of normal and barrelless mice. *Eur*  
714 *J Neurosci* 35, 855-869.
- 715 Poorthuis, R.B., Bloem, B., Schak, B., Wester, J., de Kock, C.P., and Mansvelder, H.D.  
716 (2013). Layer-specific modulation of the prefrontal cortex by nicotinic acetylcholine  
717 receptors. *Cereb Cortex* 23, 148-161.
- 718 Qi, G.X., Radnikow, G., and Feldmeyer, D. (2015). Electrophysiological and Morphological  
719 Characterization of Neuronal Microcircuits in Acute Brain Slices Using Paired Patch-Clamp  
720 Recordings. *Jove-J Vis Exp*.
- 721 Radnikow, G., and Feldmeyer, D. (2018). Layer- and Cell Type-Specific Modulation of  
722 Excitatory Neuronal Activity in the Neocortex. *Front Neuroanat* 12, 1.
- 723 Sarter, M., Parikh, V., and Howe, W.M. (2009). Phasic acetylcholine release and the volume  
724 transmission hypothesis: time to move on. *Nat Rev Neurosci* 10, 383-390.
- 725 Sundberg, S.C., Lindstrom, S.H., Sanchez, G.M., and Granseth, B. (2018). Cre-expressing  
726 neurons in visual cortex of Ntsr1-Cre GN220 mice are corticothalamic and are depolarized  
727 by acetylcholine. *J Comp Neurol* 526, 120-132.
- 728 Tasic, B., Menon, V., Nguyen, T.N., Kim, T.K., Jarsky, T., Yao, Z., Levi, B., Gray, L.T.,  
729 Sorensen, S.A., Dolbeare, T., *et al.* (2016). Adult mouse cortical cell taxonomy revealed by  
730 single cell transcriptomics. *Nat Neurosci* 19, 335-346.
- 731 Teles-Grilo Ruivo, L.M., Baker, K.L., Conway, M.W., Kinsley, P.J., Gilmour, G., Phillips,  
732 K.G., Isaac, J.T.R., Lowry, J.P., and Mellor, J.R. (2017). Coordinated Acetylcholine Release  
733 in Prefrontal Cortex and Hippocampus Is Associated with Arousal and Reward on Distinct  
734 Timescales. *Cell Rep* 18, 905-917.
- 735 Thiele, A. (2013). Muscarinic signaling in the brain. *Annu Rev Neurosci* 36, 271-294.
- 736 Thomson, A.M. (2010). Neocortical layer 6, a review. *Front Neuroanat* 4, 13.

- 737 Tian, M.K., Bailey, C.D., and Lambe, E.K. (2014). Cholinergic excitation in mouse primary  
738 vs. associative cortex: region-specific magnitude and receptor balance. *Eur J Neurosci* *40*,  
739 2608-2618.
- 740 Urban-Ciecko, J., Jouhanneau, J.S., Myal, S.E., Poulet, J.F.A., and Barth, A.L. (2018).  
741 Precisely Timed Nicotinic Activation Drives SST Inhibition in Neocortical Circuits. *Neuron*  
742 *97*, 611-625 e615.
- 743 van Aerde, K.I., Qi, G., and Feldmeyer, D. (2013). Cell Type-Specific Effects of Adenosine  
744 on Cortical Neurons. *Cerebral cortex*.
- 745 West, D.C., Mercer, A., Kirchhecker, S., Morris, O.T., and Thomson, A.M. (2006). Layer 6  
746 cortico-thalamic pyramidal cells preferentially innervate interneurons and generate  
747 facilitating EPSPs. *Cereb Cortex* *16*, 200-211.
- 748 Wester, J.C., and Contreras, D. (2013). Differential modulation of spontaneous and evoked  
749 thalamocortical network activity by acetylcholine level in vitro. *J Neurosci* *33*, 17951-17966.
- 750 Yang, Q., Chen, C.C., Ramos, R.L., Katz, E., Keller, A., and Brumberg, J.C. (2014). Intrinsic  
751 properties of and thalamocortical inputs onto identified corticothalamic-VPM neurons.  
752 *Somatosens Mot Res* *31*, 78-93.
- 753 Zaborszky, L., Csordas, A., Mosca, K., Kim, J., Gielow, M.R., Vadasz, C., and Nadasdy, Z.  
754 (2015). Neurons in the basal forebrain project to the cortex in a complex topographic  
755 organization that reflects corticocortical connectivity patterns: an experimental study based  
756 on retrograde tracing and 3D reconstruction. *Cereb Cortex* *25*, 118-137.
- 757 Zhang, Z., and Seguela, P. (2010). Metabotropic induction of persistent activity in layers II/III  
758 of anterior cingulate cortex. *Cereb Cortex* *20*, 2948-2957.
- 759 Zhang, Z.W., and Deschenes, M. (1997). Intracortical axonal projections of lamina VI cells  
760 of the primary somatosensory cortex in the rat: a single-cell labeling study. *J Neurosci* *17*,  
761 6365-6379.

## 762 **Materials and Methods**

### 763 **Slice preparation and solutions for electrophysiology**

764 All experiments involving animals were performed in accordance with the EU Directive  
765 2010/63/EU, the German animal welfare act and the guidelines of the Federation of  
766 European Laboratory Animal Science Association (FELASA). Wistar rats (Charles River)  
767 were maintained on a 12/12-hr light-dark cycle from 7 AM to 7 PM. Rats aged 17-21  
768 postnatal days (P17-21, both sexes) were lightly anaesthetized with a concentration < 0.1%  
769 of isoflurane and then decapitated. The brain was quickly removed and transferred into ice-  
770 cold artificial cerebrospinal fluid (ACSF) containing a high  $Mg^{2+}$ - and a low  $Ca^{2+}$ -  
771 concentration (4 mM  $MgCl_2$  and 1 mM  $CaCl_2$ ) to reduce synaptic activity and bubbled  
772 continuously with carbogen (95%  $O_2$  and 5%  $CO_2$ ). It was then placed on the ramp of a  
773 slope of  $10^\circ$  and were cut at an angle of  $50^\circ$  to the midline (Agmon and Connors, 1991).  
774 Thalamocortical slices were cut at 350  $\mu m$  thickness using a high vibration frequency and  
775 incubated for 30-60 minutes at room temperature (21-24°C) in slicing solution. During whole-  
776 cell patch clamp recordings, slices were continuously perfused with a perfusion solution  
777 containing (in mM): 125 NaCl, 2.5 KCl, 25 D-glucose, 25  $NaHCO_3$ , 1.25  $NaH_2PO_4$ , 2  $CaCl_2$ ,  
778 1  $MgCl_2$ , 3 myo-inositol, 2 sodium pyruvate and 0.4 ascorbic acid, bubbled with carbogen  
779 and maintained at a temperature of 30-33°C. Patch pipettes were filled with an internal  
780 solution containing (in mM): 135 K gluconate, 4 KCl, 10 HEPES, 10 phosphocreatine, 4 Mg-  
781 ATP and 0.3 GTP (pH 7.4, 290-300 mOsm). To stain the patched neurons, biocytin was  
782 added at a concentration between 3-5 mg/ml to the pipette solution; a recording time of ~15-  
783 30 minutes was necessary for biocytin to diffuse into the dendrites and axons of the recorded  
784 cells (Marx et al., 2012; Qi et al., 2015). No biocytin was added to the internal solution of  
785 'searching' pipettes used during searching for synaptic connections.

786

### 787 **Cell identification**

788 Slices were placed in the recording chamber under an upright microscope (fitted with 4x  
789 plan/ 0.13 numerical aperture and 40x water immersion/0.80 NA objectives; Olympus,  
790 Tokyo, Japan) with the pial surface pointing forward. The cortical layers and the barrel field  
791 were visualized at 4x magnification; the barrels can be identified in L4 as narrow dark stripes  
792 with evenly spaced, light 'hollows' and were visible in 6-8 consecutive slices. L6A neurons  
793 were identified in the upper 60% of layer 6 at 40x magnification using infrared differential  
794 interference contrast (IR-DIC) microscope (Dodt and Zieglgansberger, 1990; Meyer et al.,  
795 2010). Putative PCs and interneurons were differentiated on the basis of their intrinsic action

796 potential firing pattern during recording and after histological processing by their  
797 morphological appearance.

798

## 799 **Electrophysiological recordings**

800 Whole-cell patch clamp recordings from L6A neurons were performed at 30-33°C for an  
801 optimal oxygenation. Patch pipettes were pulled from thick-wall borosilicate capillaries (outer  
802 diameter: 2 mm; inner diameter: 1 mm) to a final resistance of 6-10 MΩ. Recordings were  
803 made using an EPC10 amplifier (HEKA, Lambrecht, Germany), sampled at 10 kHz, and  
804 filtered at 2.9 kHz using the Patch-master software (HEKA). Neurons were selected  
805 randomly and excluded from the analysis when their whole-cell series resistance exceeded  
806 40 MΩ (50 MΩ for neurons from paired-recordings) or their resting membrane potential was  
807 more depolarized than -50 mV immediately after rupturing the cell membrane. The resting  
808 membrane potential of L6A excitatory neurons was continuously recorded in the current  
809 clamp mode to monitor changes in amplitude.

810 Miniature spontaneous events were recorded in voltage-clamp mode and changes in  
811 mEPSC frequency and amplitude were analyzed. Recordings of L6A excitatory neurons  
812 were made in the presence of tetrodotoxin (TTX, 0.5 μM) and gabazine (10 μM) to inhibit  
813 AP firing and inhibitory postsynaptic currents (IPSCs), respectively. During recordings, the  
814 holding potential was set at -70mV.

815 Because the connectivity of L6A neurons was low compared to other intra-laminar  
816 connections in rat barrel cortex, we followed the 'searching procedure' described previously  
817 after patching a putative postsynaptic neuron (Feldmeyer et al., 1999; Qi et al., 2015). A  
818 monosynaptic connection can be found by patching multiple cells in 'loose cell-attached'  
819 mode. When the AP resulted in a unitary excitatory postsynaptic potential (uEPSP) in the  
820 postsynaptic L6A neuron, this presynaptic neuron was repatched with a new pipette filled  
821 with biocytin containing internal solution. APs were elicited by current injection in the  
822 presynaptic neurons and the postsynaptic response were recorded in whole cell (current  
823 clamp) mode, the effects of ACh on unitary EPSPs were then tested.

824

## 825 **Drug Application**

826 ACh (1 μM-10 mM) was bath applied via the perfusion system or puff applied through a  
827 patch pipette (tip diameter: 1-2 μm) connected to a PDES-02D device (npi electronic GmbH,  
828 Tamm, Germany). The puff pipette was placed at 10-20 μm from the same recorded neuron  
829 and a brief low pressure was applied for about 1 s. Mecamylamine (10 μM), atropine (200

830 nM-20  $\mu$ M), pirenzepine (0.5  $\mu$ M), tropicamide (1 $\mu$ M), dihydro- $\beta$ -erythroidine (DH $\beta$ E) (10  
831  $\mu$ M), tetrodotoxin (TTX) (0.5  $\mu$ M) and gabazine (10  $\mu$ M) were all bath applied; drugs were  
832 purchased from Sigma-Aldrich (Steinheim, Germany) or Tocris (Bristol, UK).

833

### 834 **Histological staining**

835 After single cell or paired recordings, brain slices containing biocytin-filled neurons were  
836 processed as described previously (Marx et al., 2012). Slices were fixed at 4°C for at least  
837 12 hours in 100 mM phosphate buffer (PB, PH 7.4) solution containing 4%  
838 paraformaldehyde (PFA) and then incubated in 0.1% triton X-100 solution containing avidin-  
839 biotinylated horseradish peroxidase (Vector ABC staining kit, Vector Lab. Inc., Burlingame,  
840 USA). The reaction was catalyzed using 3,3'-diaminobenzidine (Sigma-Aldrich, St. Louis,  
841 MO, USA) as a chromogen. Slices were again rinsed with 100 mM PB solution several times,  
842 followed by slow dehydration using ethanol and xylene. After embedding in Eukitt medium  
843 (Otto Kindler GmbH, Freiburg, Germany), the dendritic and axonal structures were clearly  
844 visible.

845 Immunofluorescence staining was performed for the identification of molecular markers  
846 expressed in L6A PCs. During electrophysiological recordings, Alexa Fluor<sup>®</sup> 594 dye (1:500,  
847 Invitrogen, Darmstadt, Germany) was added to the internal solution for post hoc  
848 identification of patched neurons. After recording, slices (350  $\mu$ m) were fixed with 4% PFA  
849 in 100mM PBS for at least 24 hours at 4°C and then permeabilized in 1% milk power solution  
850 containing 0.5% Triton X-100 and 100 mM PBS. Primary and secondary antibodies were  
851 diluted in the permeabilization solution (0.5% Triton X-100 and 100 mM PBS) shortly before  
852 experiments. For single cell-FoxP2 staining, slices were incubated overnight with Goat-anti-  
853 FoxP2 primary antibody (1:500, Santa Cruz Biotechnology, Heidelberg, Germany) at 4°C  
854 and then rinsed thoroughly with 100 mM PBS. Subsequently, slices were treated with Alexa  
855 Fluor<sup>®</sup> secondary antibodies (1:500) for 2-3 hours at room temperature in the dark. After  
856 being rinsed in 100 mM PBS the slices were embedded in Moviol. The fluorescence images  
857 were taken using the Olympus CellSens platform. The position of the patched neurons were  
858 identified by the conjugated Alexa dye, so that the expression of FoxP2 could be tested in  
859 biocytin-stained neurons. After acquiring fluorescent images, slices were incubated in 100  
860 mM PBS overnight and were processed for subsequent morphological analysis. Co-  
861 immunostaining of FoxP2 and M<sub>4</sub>R<sub>s</sub> (Rabbit-anti-M<sub>4</sub>R<sub>s</sub>, 1:500, Abbeva, Cambridge, UK)  
862 were performed with 150  $\mu$ m thin brain slices following the procedure described above.

863

## 864 **Morphological reconstructions**

865 3D reconstructions of L6A excitatory and inhibitory neurons or synaptically coupled neuron  
866 pairs labelled with biocytin were made using the NEUROLUCIDA<sup>®</sup> software  
867 (MicroBrightField Inc., Williston, VT, USA) and Olympus BX61 microscopy at 1000 X  
868 magnification. Slices were selected to be reconstructed only if the labeling quality was high  
869 and the background staining was low. Barrel borders, demarcation of different layers, pial  
870 surface and white matter were delineated during reconstructions. The cell body, the axonal  
871 and dendritic branches were reconstructed manually under constant visual inspection to  
872 detect even small collaterals. Corrections for shrinkage were performed in all spatial  
873 dimensions (factor 1.1 in the x and y axes, factor 2.1 in the z axes) ( Marx et al., 2012).  
874 Analysis of 3D reconstructed neurons was done with NEUROEXPLORER<sup>®</sup> software  
875 (MicroBrightField Inc., Williston, VT, USA).

876  
877 The neuronal polarity of reconstruction was calculated with NEUROEXPLORER<sup>®</sup> software  
878 using cubic spline smoothing. The dendritic and axonal length was averaged for each of the  
879 120 “3° sectors” around the soma. Data were recalculated, plotted in angular subdivision  
880 around the soma and polar plots were made with Grapher software (GoldenSoftware,  
881 Colorado, USA). The radian depicts degree in angles (°) with 0° towards the pial surface,  
882 90° towards the posterior-median axis, 180° towards the white matter, and 270° towards the  
883 anterior-lateral axis.

884

## 885 **Data analysis**

886 Custom written macros for Igor Pro 6 (WaveMetrics, Lake Oswego, USA) were used to  
887 analyze the recorded electrophysiological signals. The miniature spontaneous activity was  
888 analyzed using the program SPCN (<http://www.spacan.net>). A threshold of 5 pA was set  
889 manually for detecting mEPSC events, which is at least 2.5 fold larger than the noise level  
890 (< 2pA). No noise filtration was applied before data analysis.

891 The synaptic properties were evaluated as described in the previous studies (Feldmeyer et  
892 al., 1999). First, all sweeps were aligned to their corresponding presynaptic AP peaks and  
893 an average sweep was generated as the mean uEPSP. The EPSP amplitude was calculated  
894 as the difference between the mean baseline amplitude and maximum voltage of the  
895 postsynaptic event. The paired pulse ratio was defined as the second uPSP amplitude  
896 divided by the first uPSP amplitude of the mean uPSP elicited by paired APs with a  
897 stimulation frequency of 10 Hz. Failures were defined as events with amplitudes <1.5× the



898 standard deviation (SD) of the noise within the baseline window and the failure rate refers  
899 to the percentage of failures. The coefficient of variation (CV) was calculated as the SD  
900 divided by the mean uEPSP amplitude.

901

## 902 **Statistical tests**

903 For all data, the mean  $\pm$  SD was given. To assess the differences between two paired groups  
904 under different pharmacological conditions, paired Student's *t* test ( $n > 10$ ) or Wilcoxon  
905 signed rank test ( $n < 10$ ) was performed. The Mann-Whitney *U*-test was used when  $n = 4$   
906 for the paired samples or when the sample size was different between two groups. Statistical  
907 significance was set at  $P < 0.05$ ,  $n$  indicates the number of neurons or pairs analyzed.

908 **Cell Type-Specific Modulation of Layer 6A Excitatory Microcircuits by**  
909 **Acetylcholine in Rat Barrel Cortex**

910

911 Danqing Yang<sup>1</sup>, Robert Günter<sup>2</sup>, Guanxiao Qi<sup>1</sup>, Gabriele Radnikow<sup>1</sup> and Dirk Feldmeyer<sup>1,3,4\*</sup>

912

913 <sup>1</sup>Institute of Neuroscience and Medicine, INM-10, Research Centre Jülich, D-52425 Jülich,  
914 Germany

915 <sup>2</sup>Institute of Neuroscience and Medicine, INM-2, Research Centre Jülich, D-52425 Jülich,  
916 Germany

917 <sup>3</sup>Department of Psychiatry, Psychotherapy and Psychosomatics, RWTH Aachen University,  
918 D-52074 Aachen, Germany.

919 <sup>4</sup>Jülich Aachen Research Alliance, Translational Brain Medicine (JARA Brain), D-52074  
920 Aachen, Germany

921

922 \* Corresponding author:

923 Dirk Feldmeyer

924 Institute of Neuroscience and Medicine (INM-10) Research Centre Jülich

925 D-52425 Jülich

926 Germany

927 Tel.: +49-2461-61-5226

928 Fax: +49-2461-61-1778

929 E-mail: [d.feldmeyer@fz-juelich.de](mailto:d.feldmeyer@fz-juelich.de)

930

931 **Supplementary Materials**

932 Containing 1 table and 6 figures with legends

|                  | CC-CC<br>(n = 20 pairs) | CC-CT<br>(n = 5 pairs) | CC-Interneuron<br>(n = 9 pairs) | CT-pairs<br>(1 CT-CT, 1 CT-CC, 2<br>CT-interneuron pairs) |
|------------------|-------------------------|------------------------|---------------------------------|-----------------------------------------------------------|
|                  | <b>Control</b>          |                        |                                 |                                                           |
| Amplitude (mV)   | 0.45 ± 0.32             | 0.35 ± 0.22            | 0.90 ± 0.90                     | 0.11 ± 0.10                                               |
| PPR              | 1.0 ± 0.4               | 1.2 ± 0.7              | 1.0 ± 0.5                       | 3.5 ± 2.1                                                 |
| CV               | 0.7 ± 0.3               | 0.7 ± 0.1              | 0.8 ± 0.5                       | 1.2 ± 0.6                                                 |
| Failure rate (%) | 25.2 ± 22.3             | 36.5 ± 36.8            | 34.3 ± 34.8                     | 64.5 ± 31.6                                               |
| Rise time (ms)   | 1.5 ± 0.5               | 1.8 ± 1.8              | 1.0 ± 0.5                       | 1.1 ± 0.5                                                 |
| Latency (ms)     | 1.8 ± 0.9               | 1.7 ± 0.5              | 1.1 ± 0.5                       | 2.3 ± 0.6                                                 |
| Decay time (ms)  | 37.4 ± 17.5             | 33.7 ± 15.2            | 23.2 ± 15.2                     | 32.5 ± 5.3                                                |
|                  | <b>ACh (30μM)</b>       |                        |                                 |                                                           |
| Amplitude (mV)   | <b>*** 0.19 ± 0.14</b>  | <b>* 0.19 ± 0.13</b>   | <b>* 0.52 ± 0.58</b>            | <b>* 0.16 ± 0.11</b>                                      |
| PPR              | <b>** 1.5 ± 0.7</b>     | <b>* 2.1 ± 1.6</b>     | <b>** 1.2 ± 0.5</b>             | <b>* 0.5 ± 0.4</b>                                        |
| CV               | <b>*** 0.9 ± 0.3</b>    | 0.8 ± 0.3              | 1.0 ± 0.4                       | 1.1 ± 0.6                                                 |
| Failure rate (%) | <b>*** 56.8 ± 29.8</b>  | 42.0 ± 38.6            | <b>* 49.3 ± 32.5</b>            | 49.4 ± 13.9                                               |
| Rise time (ms)   | <b>** 1.2 ± 0.6</b>     | 1.6 ± 1.6              | 1.0 ± 0.4                       | 1.8 ± 0.8                                                 |
| Latency (ms)     | 1.8 ± 1.0               | 1.6 ± 0.5              | 1.3 ± 0.5                       | 2.7 ± 2.4                                                 |
| Decay time (ms)  | 31.1 ± 16.0             | 36.0 ± 24.2            | 16.1 ± 10.6                     | 43.4 ± 41.1                                               |

933

934 **Supplementary Tab. 1 uEPSP properties of L6A synaptic connections under control**  
 935 **and 30 μM acetylcholine conditions.**

936 Italic bold font indicates significant differences to control; \*P < 0.05, \*\*P < 0.01, \*\*\*P < 0.001  
 937 for Wilcoxon signed-rank test when n > 4; \* P < 0.05 for the Mann-Whitney U-test when n =  
 938 4.

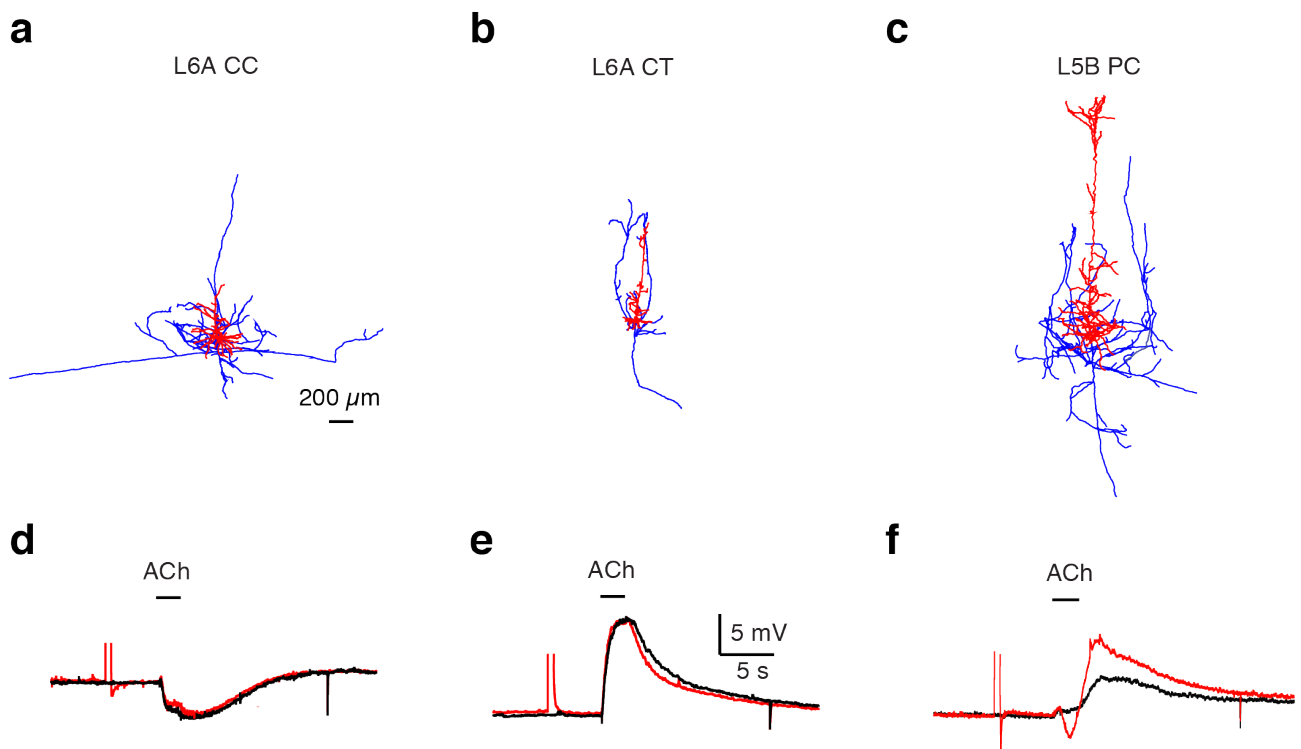

939

940 **Supplementary Fig.1 ACh-mediated hyperpolarization and depolarization are**  
941 **monophasic.**

942 **(a-c)** Morphological reconstructions of representative CC-like **(a)**, CT-like L6A pyramidal cell  
943 **(b)** and L5 pyramidal cell **(c)**.

944 **(d-f)** Current clamp recordings with (red) and without (black) suprathreshold depolarizing  
945 current pulse before ACh application (30μM) are recorded from the same neuron in a, b and  
946 c, respectively.

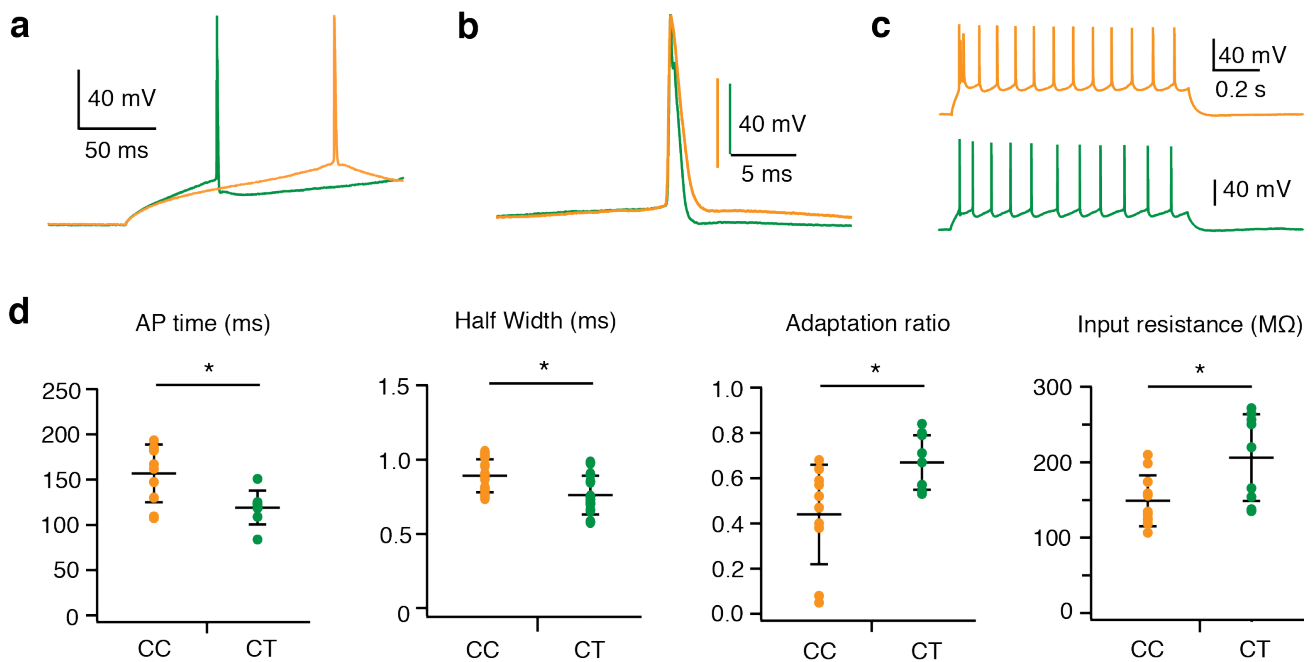

947

948 **Supplementary Fig. 2 Electrophysiological differences between CC and CT-like**  
949 **pyramidal cells.**

950 **(a)** Overlay of action potentials (APs) evoked by rheobase current from representative CC  
951 (orange) and CT (green) pyramidal cells illustrating the difference in AP time.

952 **(b)** Higher magnifications of the APs in (a) displays the difference in AP halfwidth.

953 **(c)** The firing patterns of the same neurons in (a). An initial burst was detected in the firing  
954 pattern of CC-like pyramidal cell.

955 **(d)** Histograms comparing the AP time, AP half width, Adaptation ratio (2nd ISI / 10th ISI)  
956 and input resistance for CC and CT like pyramidal cells. n = 11 for CC pyramidal cells and  
957 n = 9 for CT pyramidal cells. \*P < 0.05 for the Mann Whitney u-test.

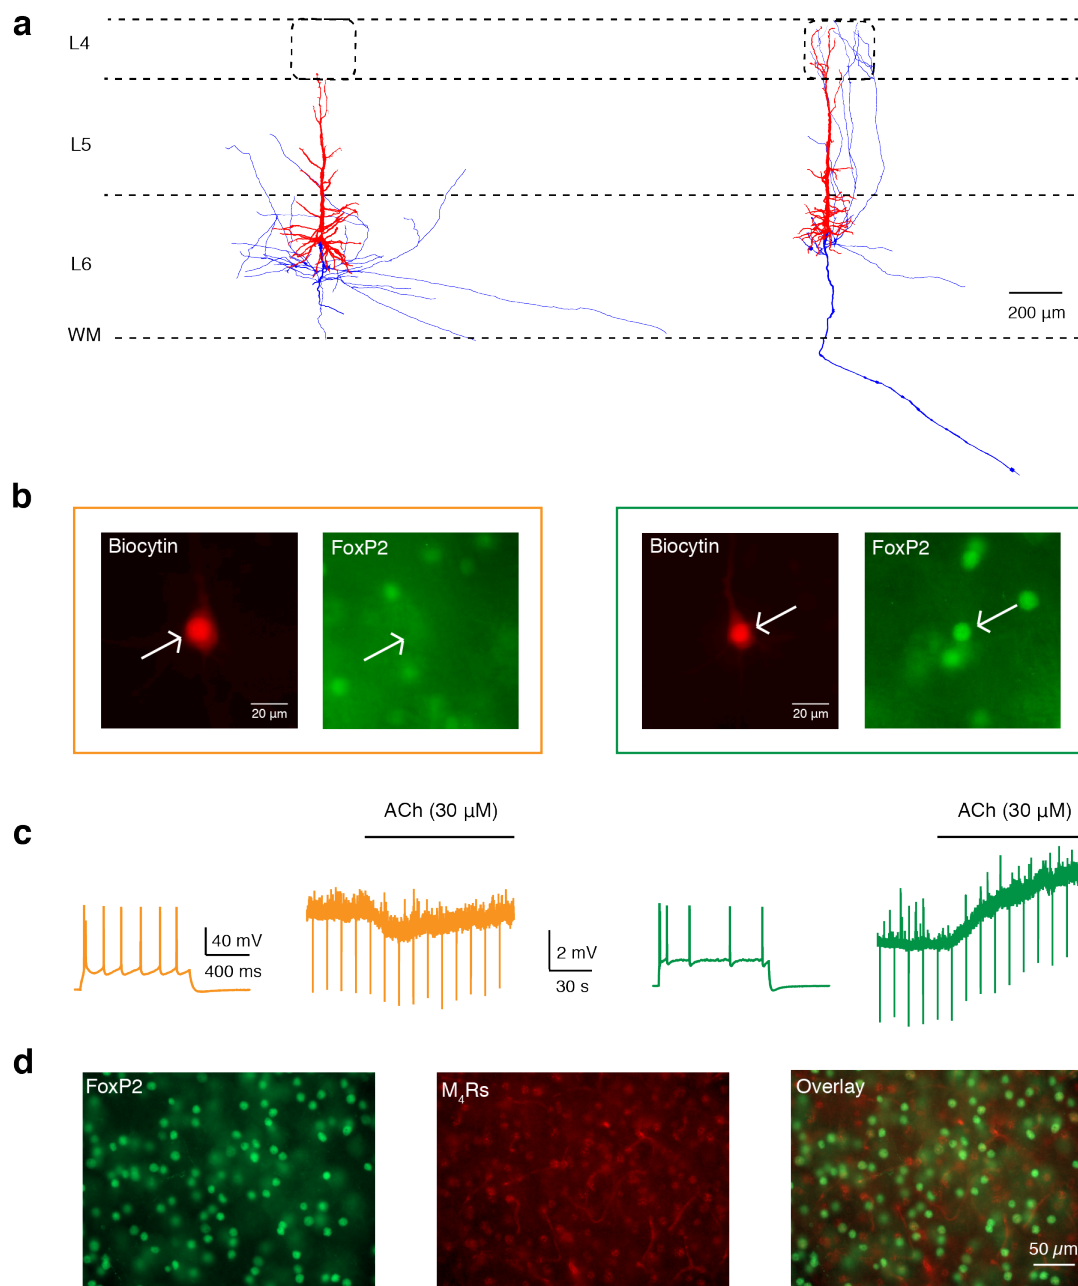

958

959 **Supplementary Fig. 3 Molecular marker expression of L6A pyramidal cells in rat barrel**  
960 **cortex.**

961 **(a)** Morphological reconstructions of a CC-like (left) and a CT-like (right) pyramidal cell. Axon  
962 is labeled in blue, soma and dendrites in red.

963 **(b)** The same neurons from **(a)** are recorded using whole-cell patch-clamp technique with  
964 filling biocytin coupled to Alexa 594 (red) to identify the neuronal location and morphology.  
965 The co-expression of FoxP2 (green) is tested.

966 **(c)** Corresponding firing patterns and cholinergic responses (30 $\mu\text{M}$ ) of CC (left) and CT-like  
967 pyramidal cell (right) from **(a)** are shown.

968 **(d)** Comparison of FoxP2 immunostaining (left, green) and M<sub>4</sub> muscarinic receptors staining  
969 (middle, red) on the same sections of cortical layer 6A in rat barrel cortex. Superimposed  
970 image is shown on the right.

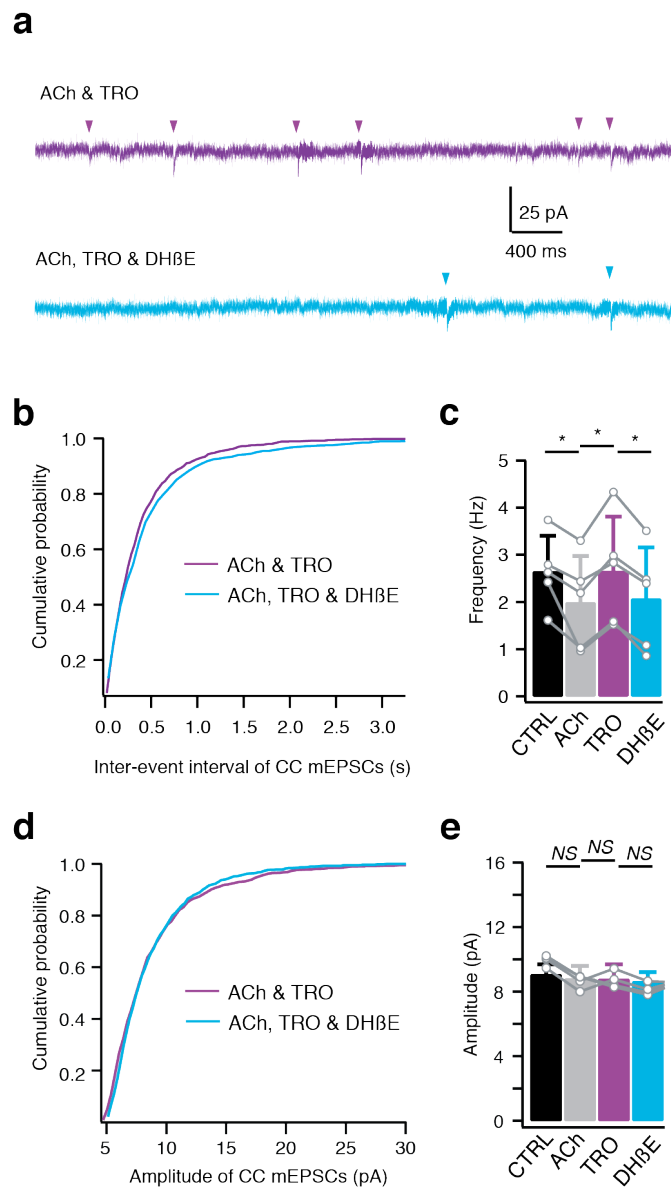

971 **Supplementary Fig. 4 ACh increases miniature spontaneous activity in CC PCs via**  
 972  **$\alpha 4\beta 2$  nAChRs.**

973 **(a)** Representative voltage-clamp recordings of a CC-like pyramidal cell following co-bath  
 974 application of ACh (30 $\mu$ M) and different receptor antagonists. Applying of 10 $\mu$ M DH $\beta$ E  
 975 decreased frequency of mEPSC events. Traces of inward mEPSCs were recorded in the  
 976 presence of TTX (0.5  $\mu$ M) and GABAzine (10  $\mu$ M) with a holding potential of -70 mV.

977 **(b)** Cumulative distributions of mEPSC inter-event interval recorded in L6A CC cells (n = 5)  
 978 following co-bath application of ACh and different receptor antagonists.

979 **(c)** Histograms of mEPSCs frequency recorded in L6A CC cells under control, ACh, ACh &  
 980 TRO and ACh & TRO & DH $\beta$ E conditions. n = 5, \* P < 0.05 for Wilcoxon signed-rank test.  
 981 Error bars represent SD.

982 **(d)** Cumulative distributions of mEPSC amplitude recorded in L6A CC cells (n = 5) following  
 983 co-bath application of ACh and different receptor antagonists.

984 **(e)** Histograms of mEPSCs amplitude recorded in L6A CC cells under control, ACh, ACh &  
 985 TRO and ACh & TRO & DH $\beta$ E conditions. n = 5, not significant (NS) for Wilcoxon signed-  
 986 rank test. Error bars represent SD.

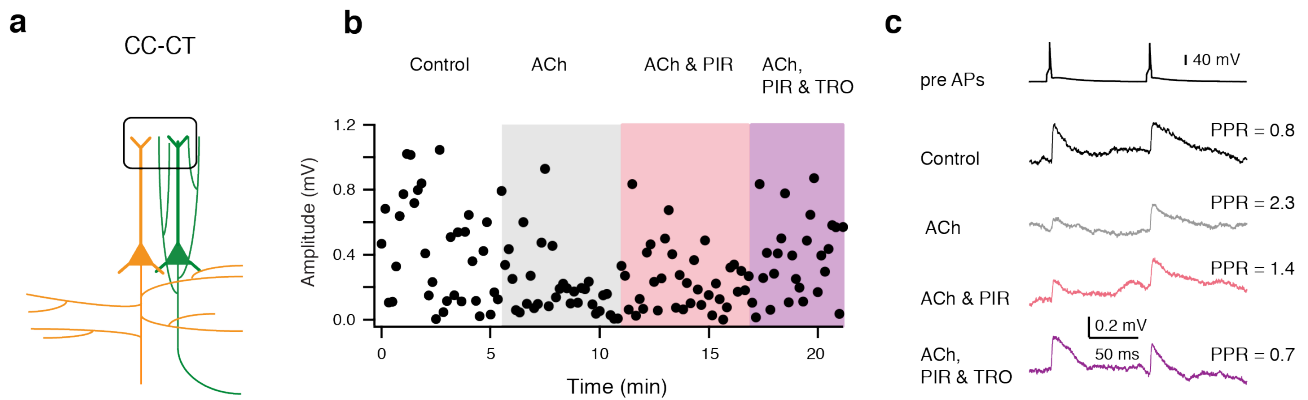

987 **Supplementary Fig. 5 Pharmacological experiments on a CC-CT synaptically coupled**  
988 **L6A pair.**

989 **(a)** Schematic diagram of a CC-CT connection. The presynaptic CC PC is shown in orange  
990 and the postsynaptic CT PC in green. Barrel structure indicates layer 4.

991 **(b)** Time course of first EPSP amplitude changes. Gray phase, application of ACh (30 $\mu$ M);  
992 Pink phase, co-application of ACh and PIR (0.5 $\mu$ M); Purple phase, co-application of ACh,  
993 PIR and TRO (1 $\mu$ M). Data are recorded from the pair shown in (a).

994 **(c)** Average EPSPs under different pharmacological conditions shown in **(b)**. The  
995 presynaptic APs are shown at the top. The PPR values of different traces are indicated on  
996 the right.



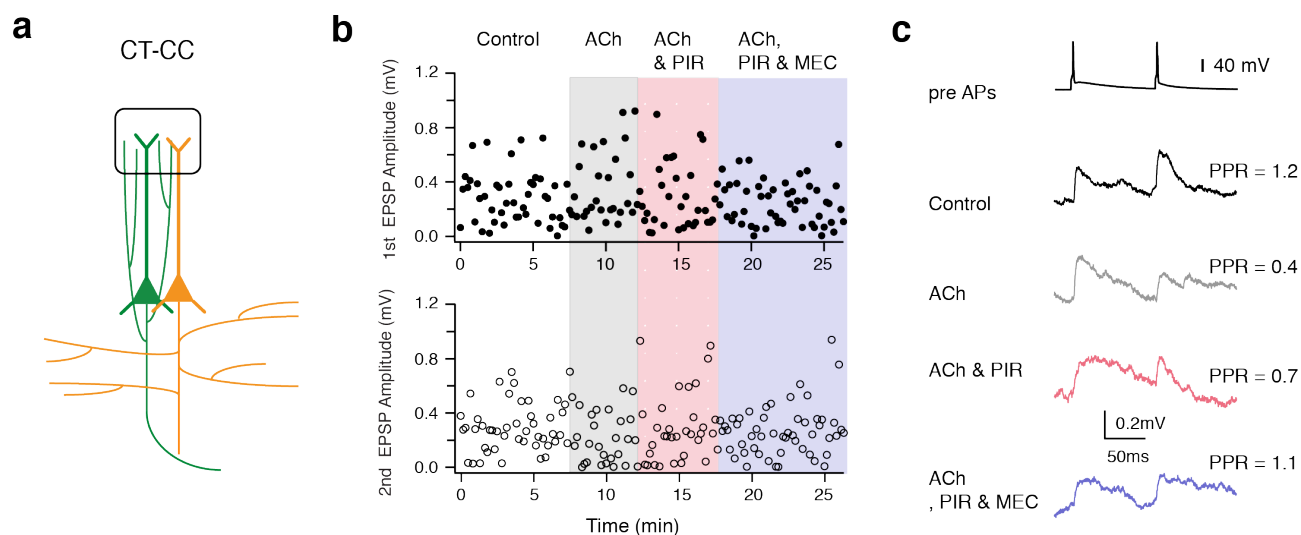

997 **Supplementary Fig. 6 Pharmacological experiments on a CT-CC synaptically coupled**  
998 **L6A pair.**

999 **(a)** Schematic diagram of a CT-CC connection. The presynaptic CT PC is shown in green  
1000 and the postsynaptic CC PC in orange. Barrel structure indicates layer 4.

1001 **(b)** Top, time course of first uEPSP amplitude changes. Bottom, time course of second  
1002 EPSP amplitude changes. Gray phase, application of ACh (30 $\mu$ M); Pink phase, co-  
1003 application of ACh and PIR (0.5 $\mu$ M); Violet phase, co-application of ACh, PIR and MEC  
1004 (10 $\mu$ M). The data are recorded from the neuron pair shown in (a).

1005 **(c)** Mean uEPSPs under different pharmacological conditions shown in (b). The presynaptic  
1006 APs are shown at the top. The PPR values of different traces are indicated on the right.
